# Supplementary material for: Reactivity of acyclic (pentadienyl)iron(1+) cations: Synthetic studies directed toward the frondosins
Source: Royal Society of Chemistry journal article supplement (doi:10.1039/c1ob05720k), 2011-01-01
Supplement: c1ob05720k.pdf [file c1ob05720k.pdf]

*Electronic Supporting Information*

**Reactivity of acyclic (pentadienyl)iron(1+) cations: Synthetic studies directed toward the frondosins**

Do W. Lee, Rajesh K. Pandey, Sergey Lindeman, and William A. Donaldson\*

|                                                                                   |     |
|-----------------------------------------------------------------------------------|-----|
| <sup>1</sup> H NMR spectrum of (±)- <b>8</b> (CDCl <sub>3</sub> )                 | S2  |
| <sup>13</sup> C NMR spectrum of (±)- <b>8</b> (CDCl <sub>3</sub> )                | S3  |
| <sup>1</sup> H NMR spectrum of (±)- <b>9a</b> (CD <sub>3</sub> NO <sub>2</sub> )  | S4  |
| <sup>13</sup> C NMR spectrum of (±)- <b>9a</b> (CD <sub>3</sub> NO <sub>2</sub> ) | S5  |
| <sup>1</sup> H NMR spectrum of (±)- <b>10</b> (CDCl <sub>3</sub> )                | S6  |
| <sup>13</sup> C NMR spectrum of (±)- <b>10</b> (CDCl <sub>3</sub> )               | S7  |
| <sup>1</sup> H NMR spectrum of (±)- <b>11</b> (CDCl <sub>3</sub> )                | S8  |
| <sup>13</sup> C NMR spectrum of (±)- <b>11</b> (CDCl <sub>3</sub> )               | S9  |
| <sup>1</sup> H NMR spectrum of (±)- <b>15</b> (CDCl <sub>3</sub> )                | S10 |
| <sup>13</sup> C NMR spectrum of (±)- <b>15</b> (CDCl <sub>3</sub> )               | S11 |
| <sup>1</sup> H NMR spectrum of (±)- <b>16a</b> (CDCl <sub>3</sub> )               | S12 |
| <sup>13</sup> C NMR spectrum of (±)- <b>16a</b> (CDCl <sub>3</sub> )              | S13 |
| <sup>1</sup> H NMR spectrum of (±)- <b>17a</b> (CDCl <sub>3</sub> )               | S14 |
| <sup>13</sup> C NMR spectrum of (±)- <b>17a</b> (CDCl <sub>3</sub> )              | S15 |
| <sup>1</sup> H NMR spectrum of (±)- <b>16b</b> (CDCl <sub>3</sub> )               | S16 |
| <sup>13</sup> C NMR spectrum of (±)- <b>16b</b> (CDCl <sub>3</sub> )              | S17 |
| <sup>1</sup> H NMR spectrum of (±)- <b>17b</b> (CDCl <sub>3</sub> )               | S18 |
| <sup>13</sup> C NMR spectrum of (±)- <b>17b</b> (CDCl <sub>3</sub> )              | S19 |
| <sup>1</sup> H NMR spectrum of (±)- <b>12</b> (CDCl <sub>3</sub> )                | S20 |
| <sup>13</sup> C NMR spectrum of (±)- <b>12</b> (CDCl <sub>3</sub> )               | S21 |
| <sup>1</sup> H NMR spectrum of (±)- <b>18a</b> (CDCl <sub>3</sub> )               | S22 |
| <sup>13</sup> C NMR spectrum of (±)- <b>18a</b> (CDCl <sub>3</sub> )              | S23 |
| <sup>1</sup> H NMR spectrum of (±)- <b>18b</b> (CDCl <sub>3</sub> )               | S24 |
| <sup>13</sup> C NMR spectrum of (±)- <b>18b</b> (CDCl <sub>3</sub> )              | S25 |
| ORTEP of (±)- <b>10</b>                                                           | S26 |
| ORTEP of (±)- <b>11</b>                                                           | S26 |
| ORTEP of (±)- <b>15</b>                                                           | S27 |
| ORTEP of (±)- <b>16a</b>                                                          | S27 |

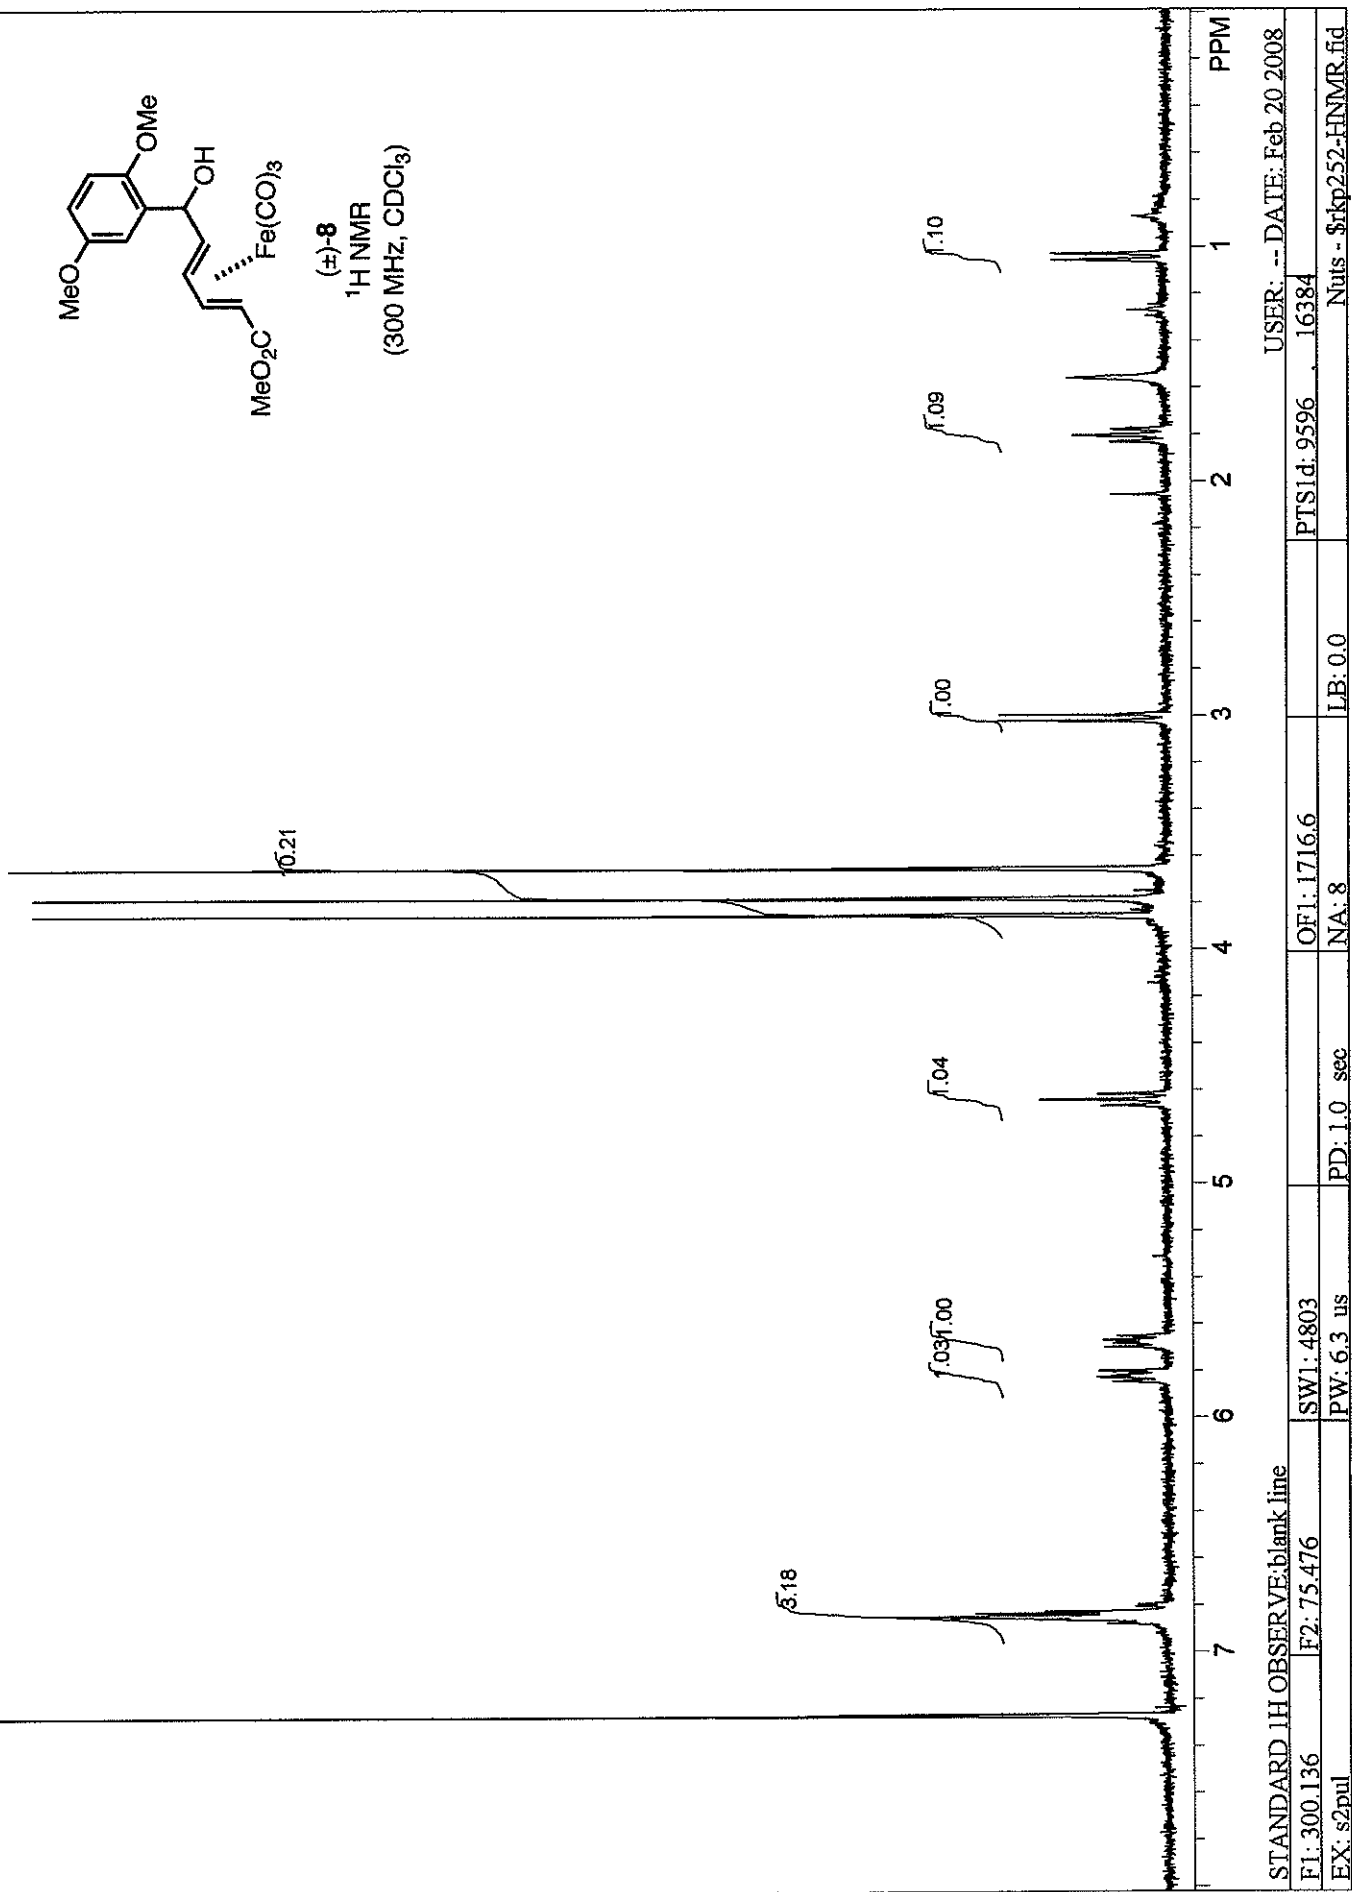

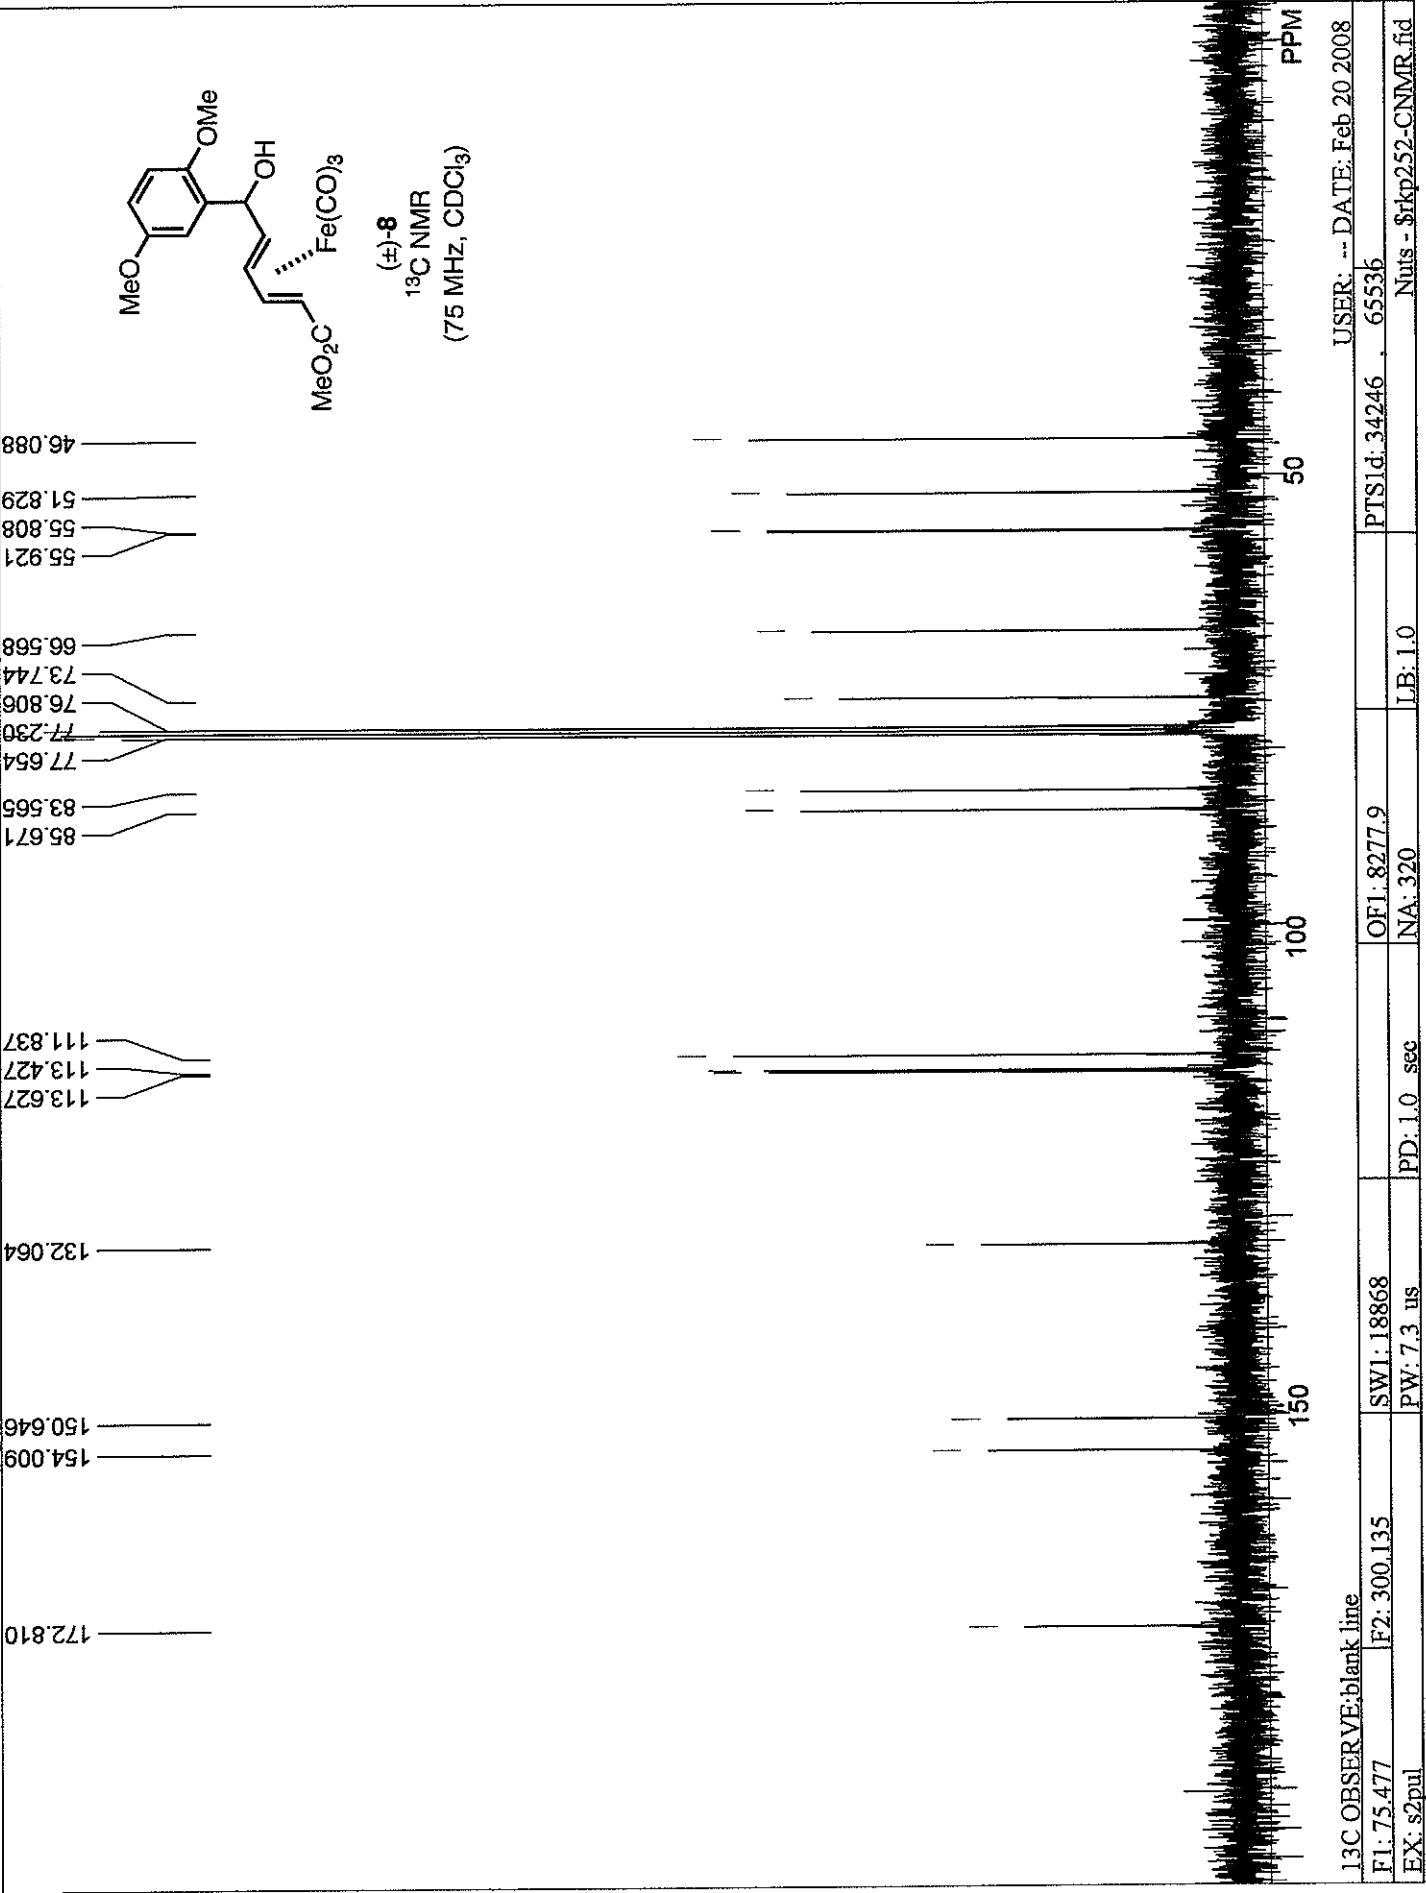

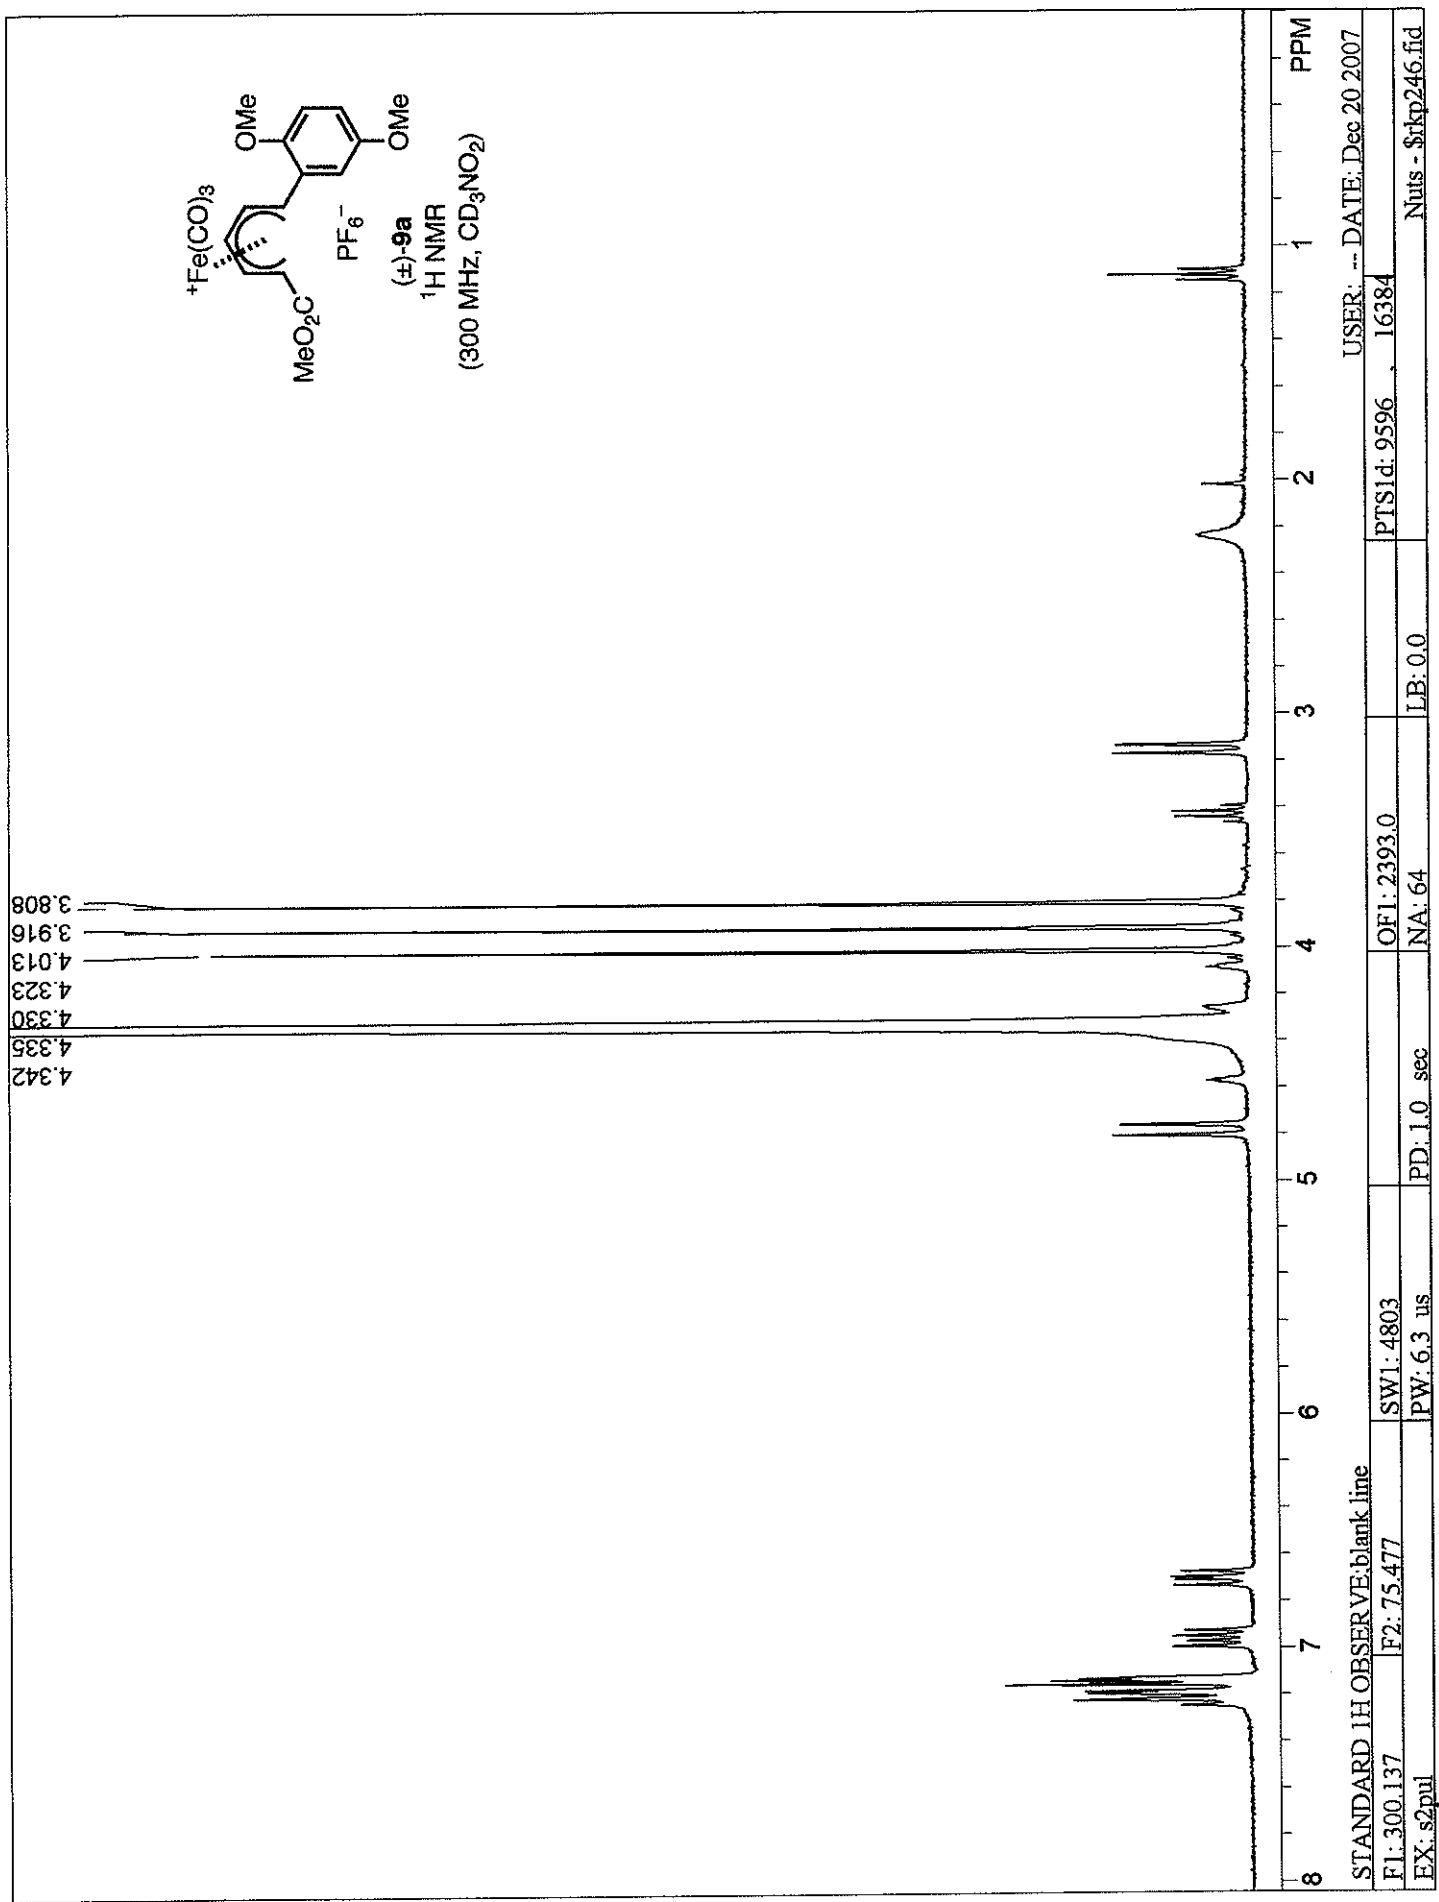

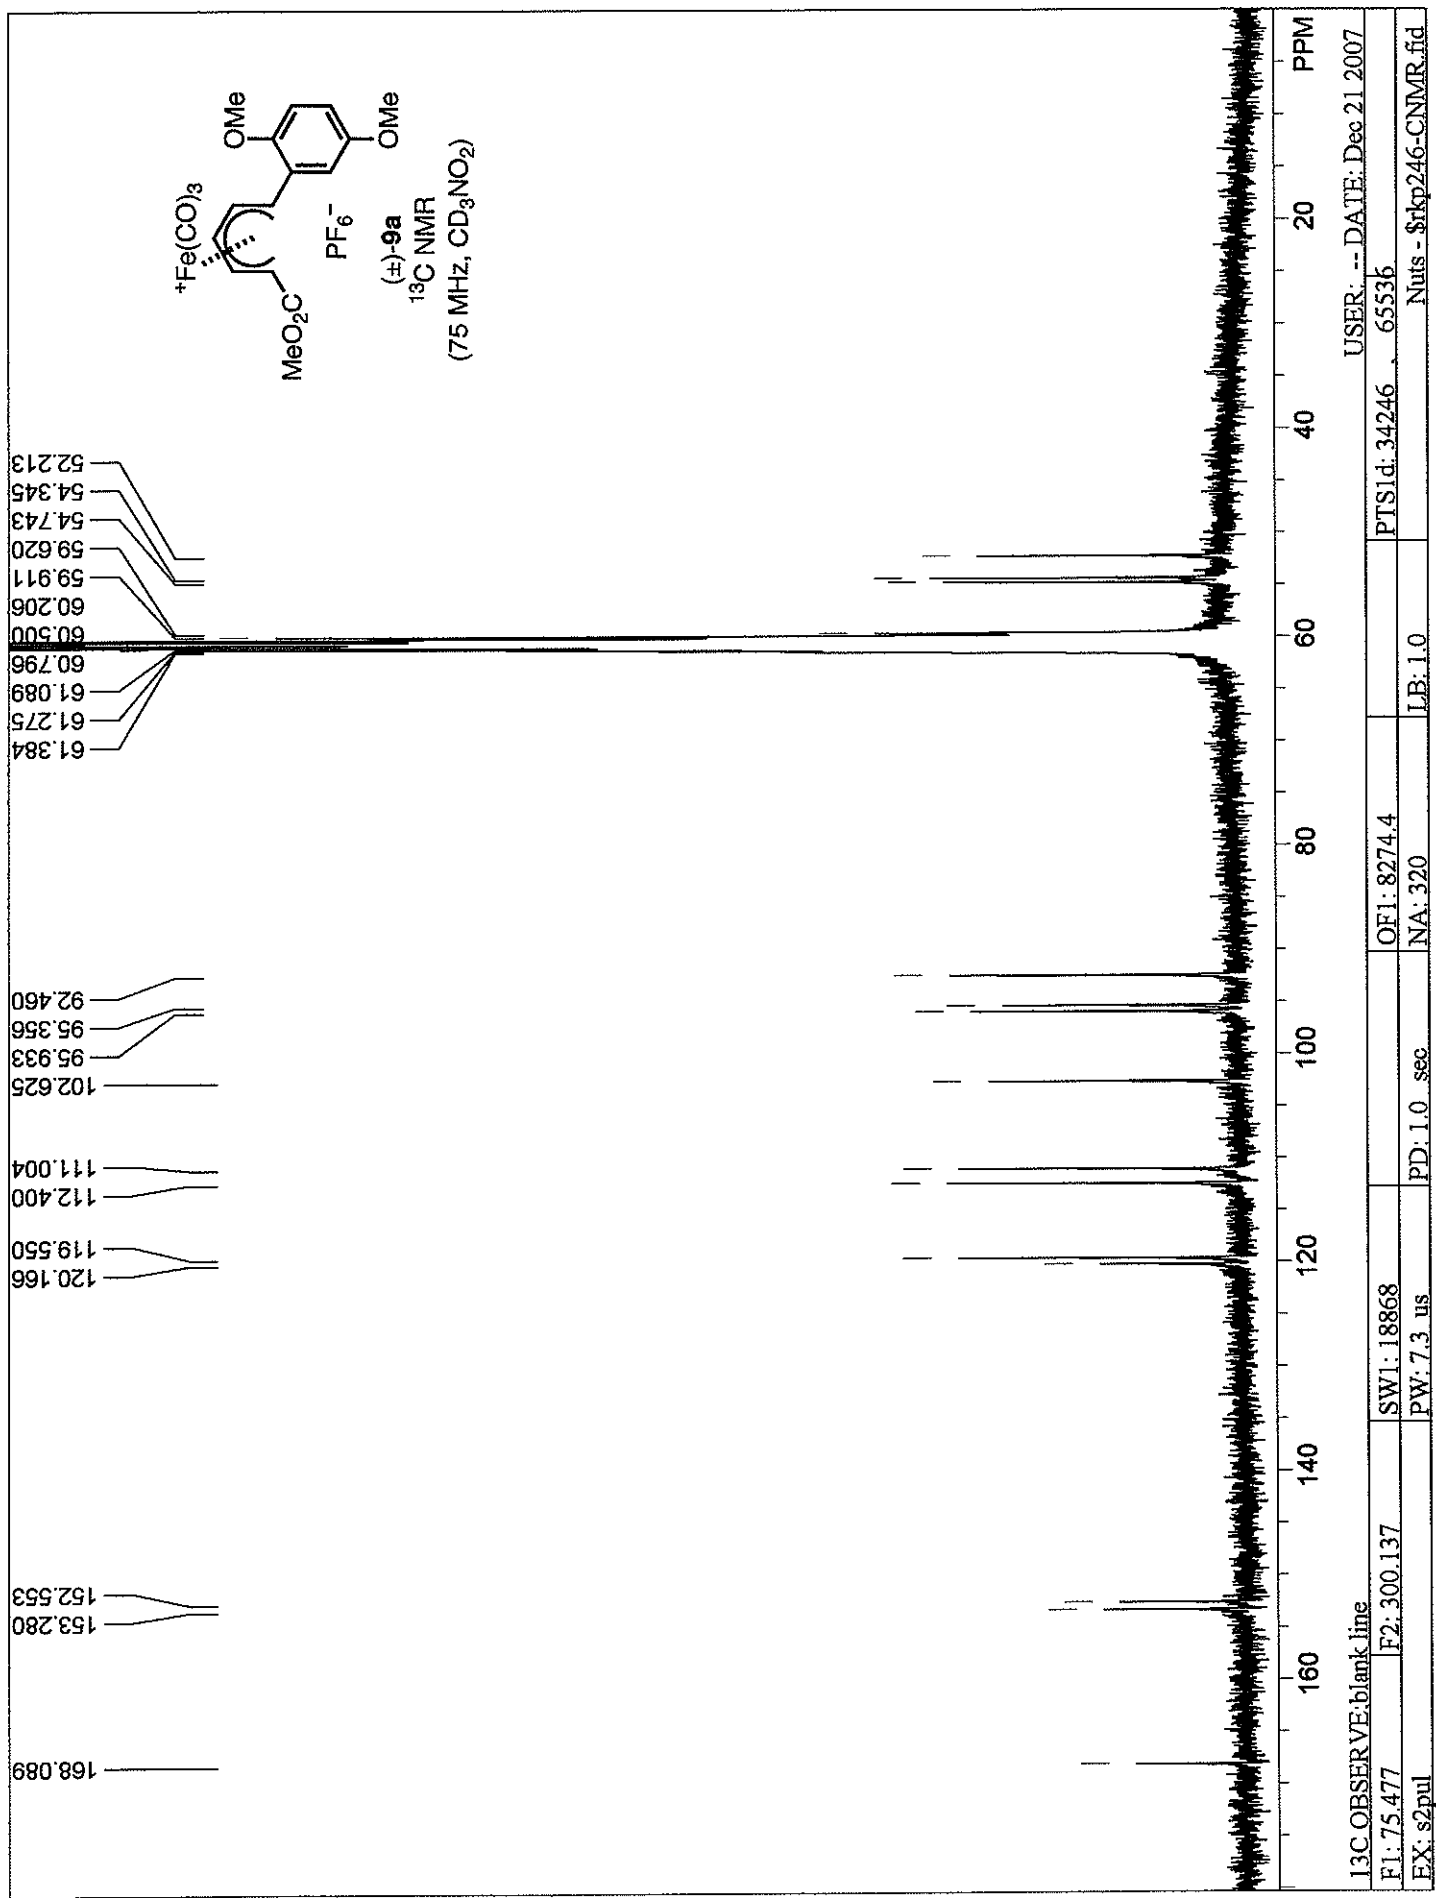

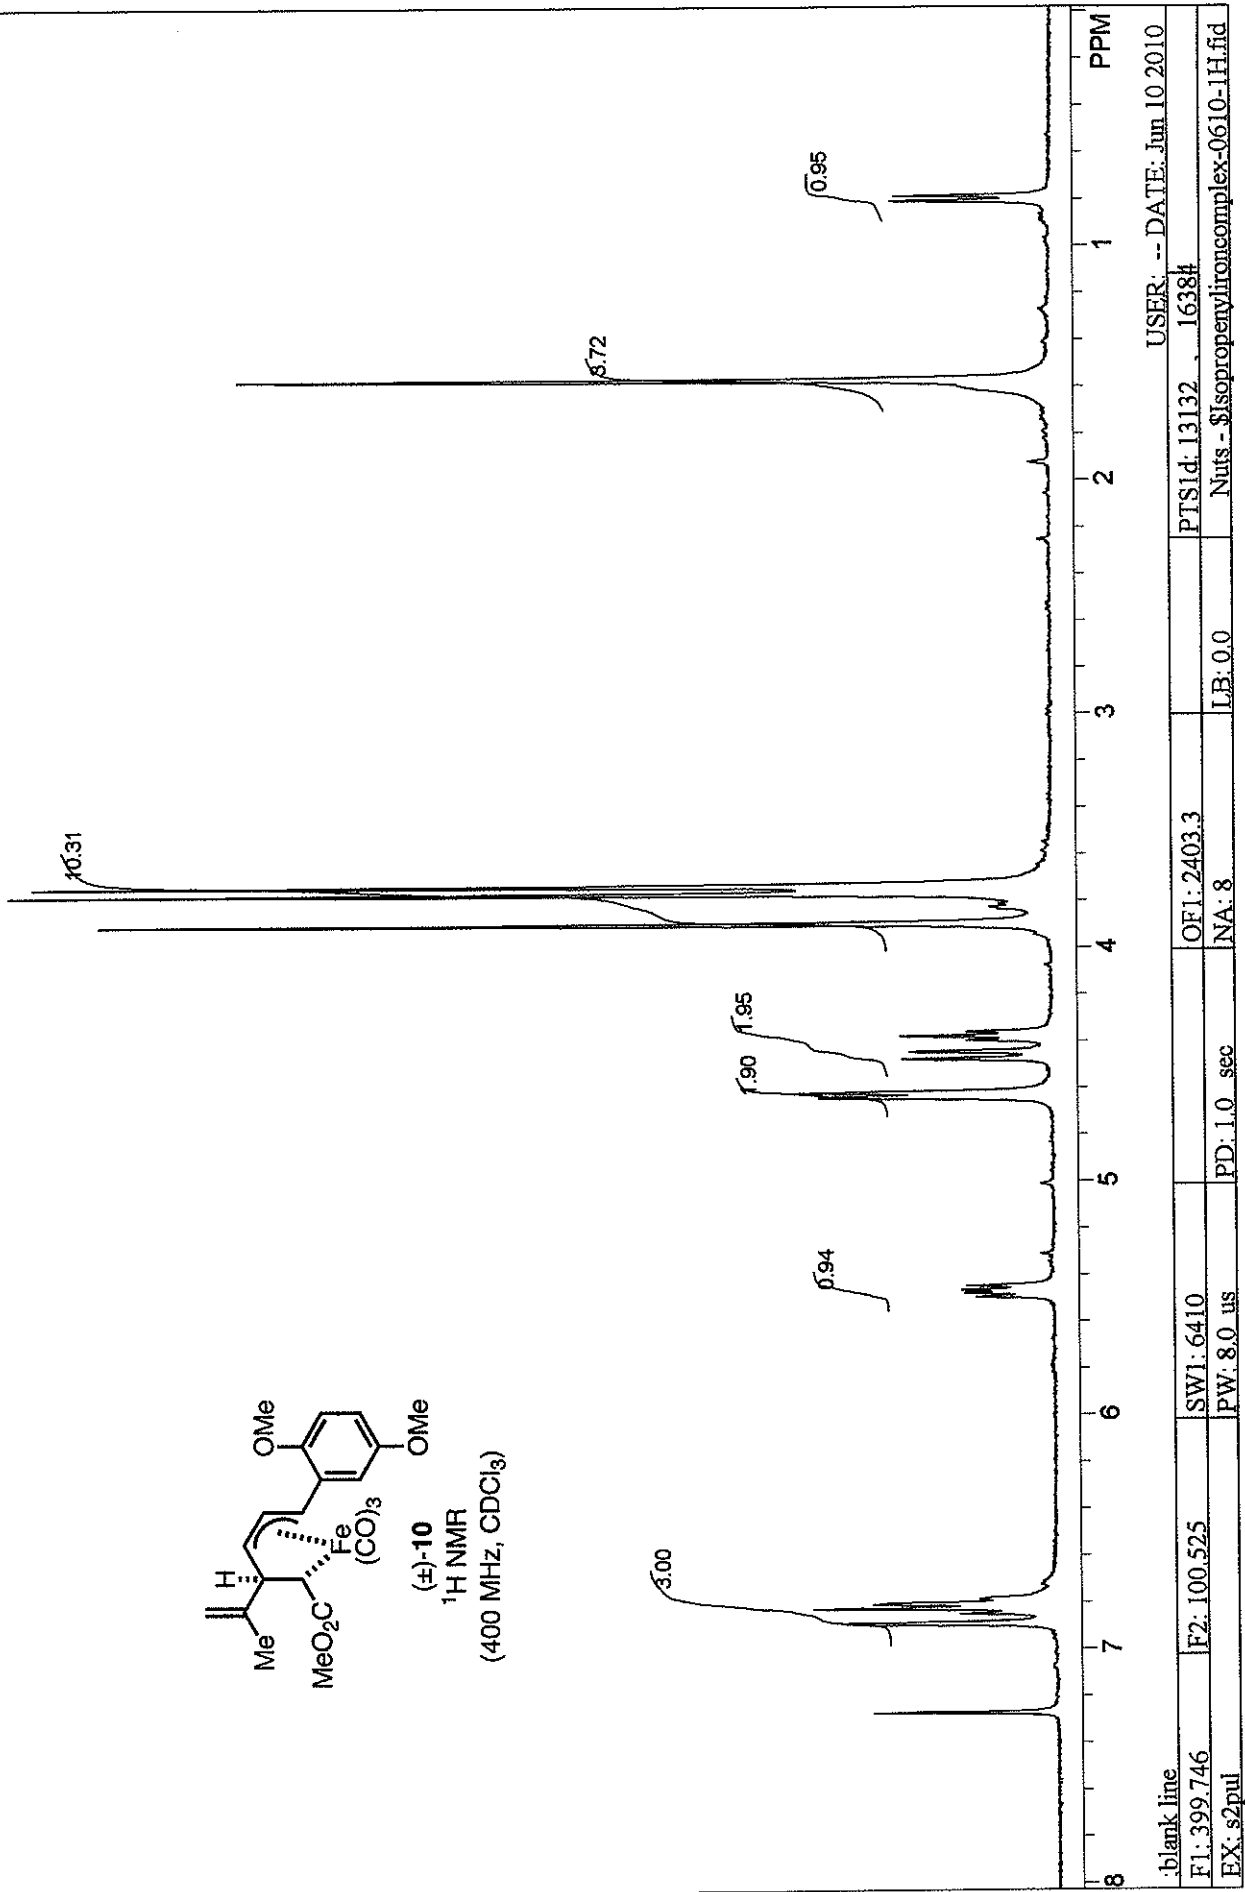

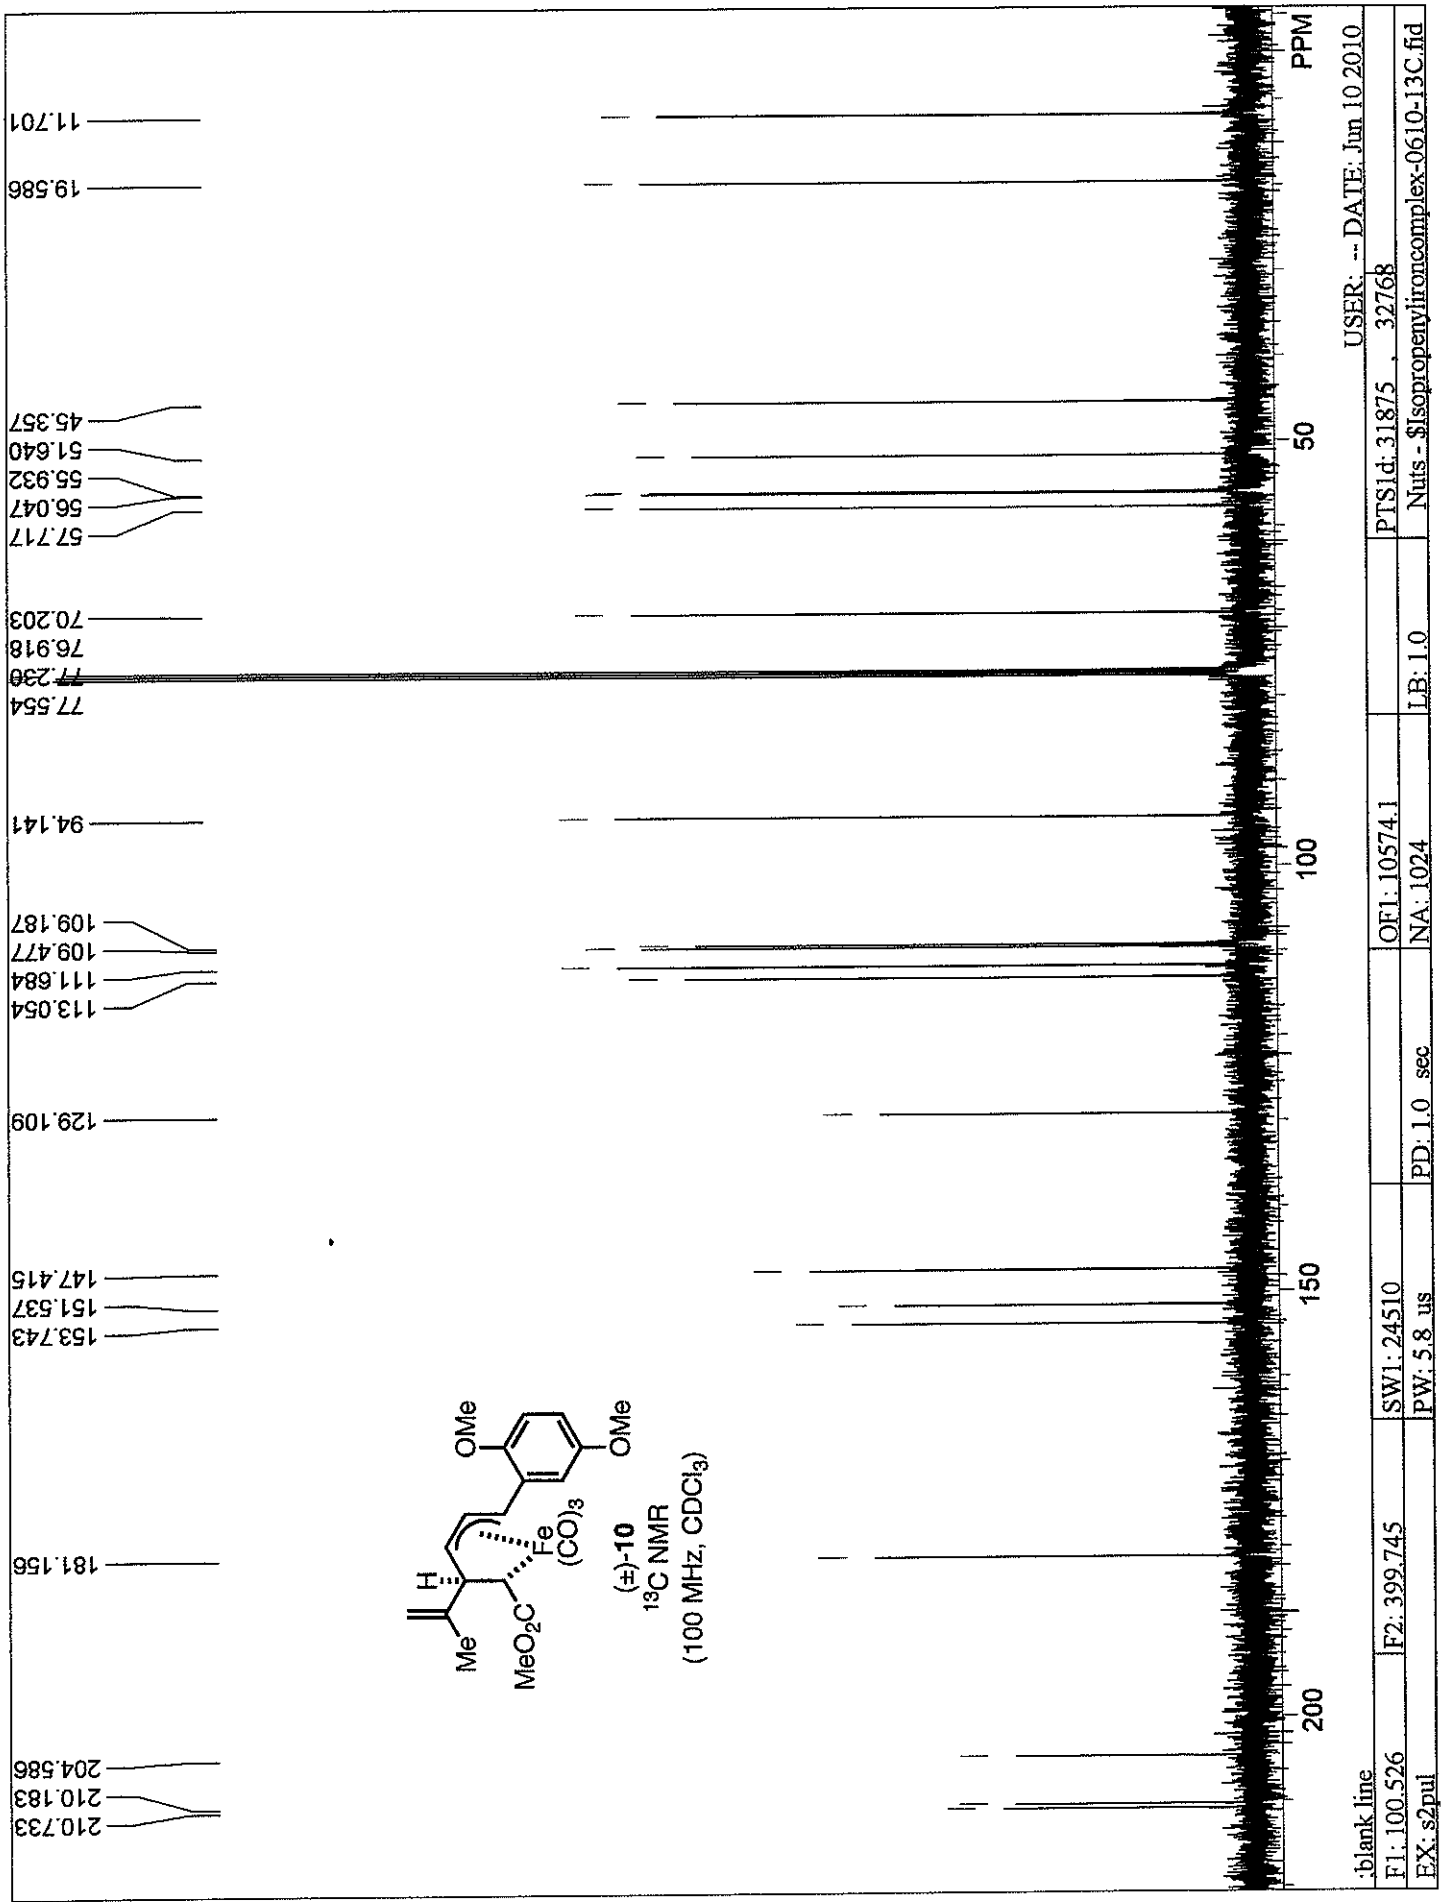

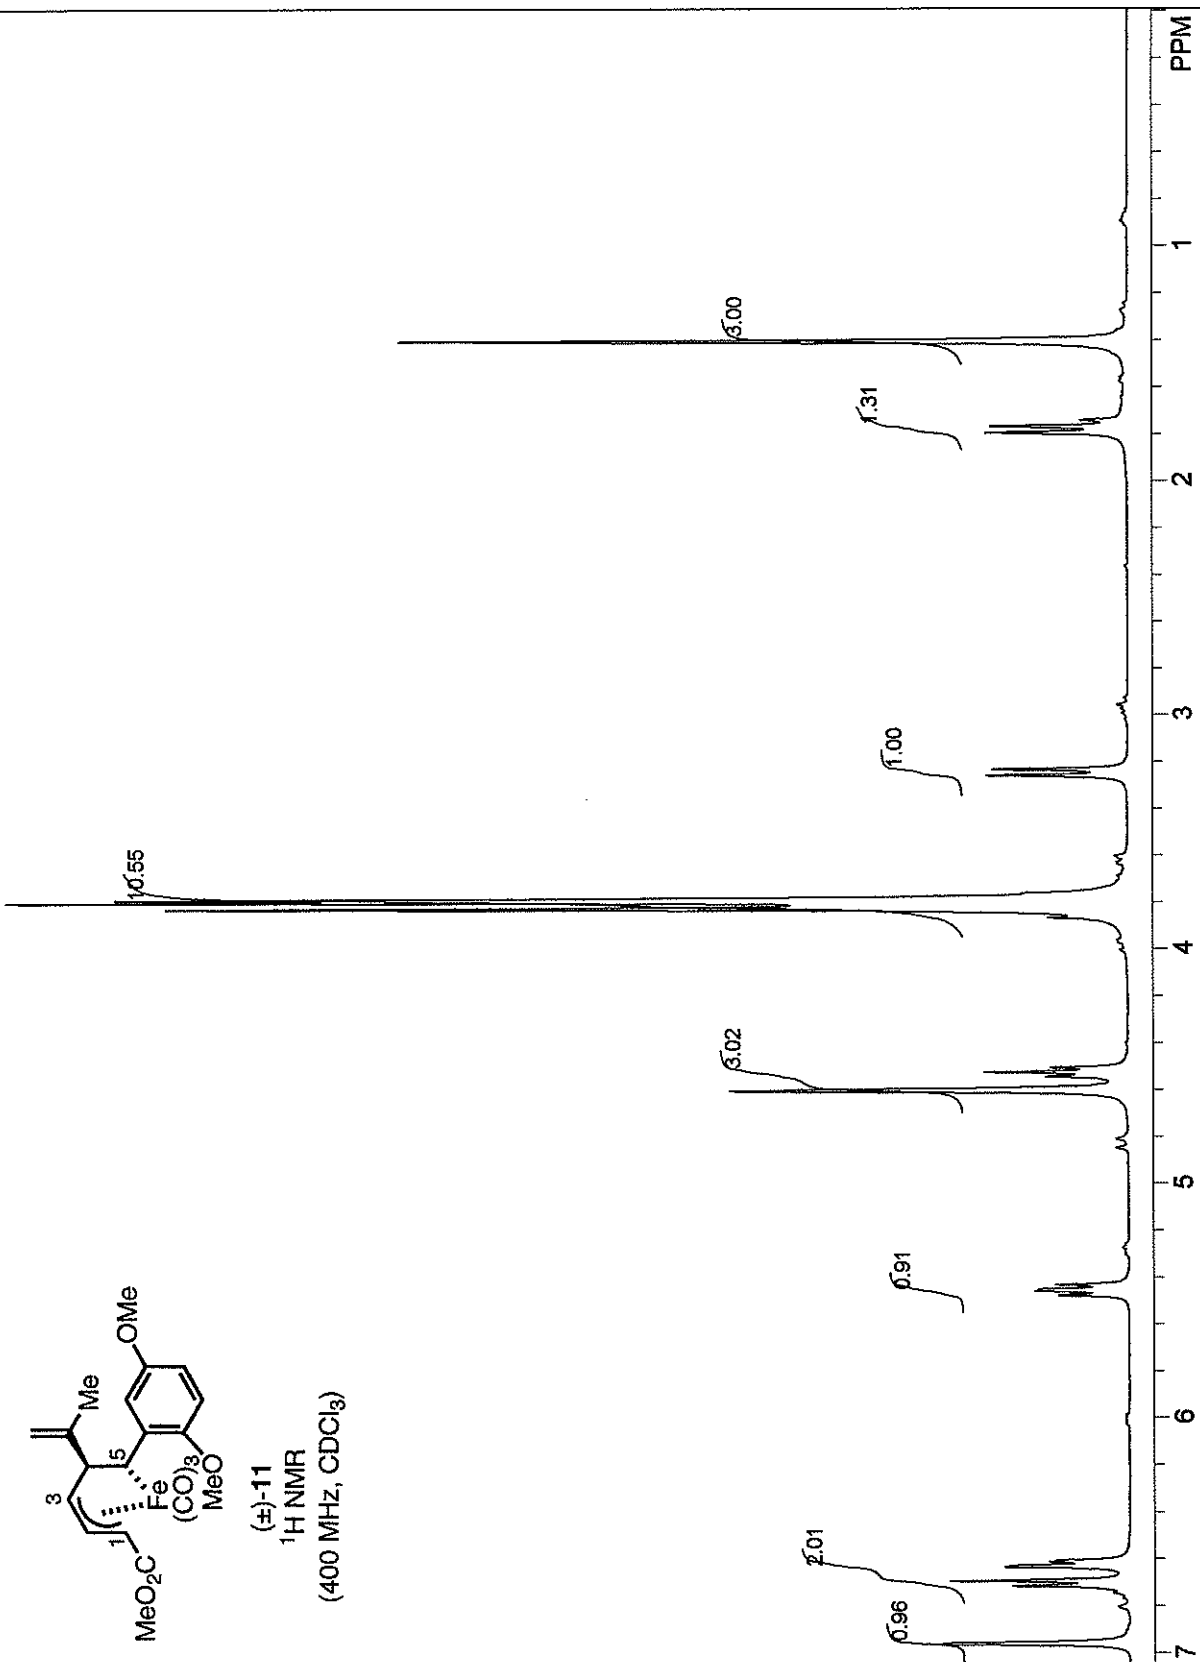

|             |             |            |             |                            |         |                                                     |  |
|-------------|-------------|------------|-------------|----------------------------|---------|-----------------------------------------------------|--|
| .blank line |             |            |             | USER: -- DATE: Jun 18 2010 |         |                                                     |  |
| F1: 399.746 | F2: 100.525 | SW1: 6410  | OF1: 2403.5 | PTS1d: 13132               | 16384   |                                                     |  |
| EX: s2pul   |             | PW: 8.0 us | PD: 1.0 sec | NA: 8                      | LB: 0.0 | Nuts - \$isopropenylironcomplex-1stband-0618-1H.fid |  |



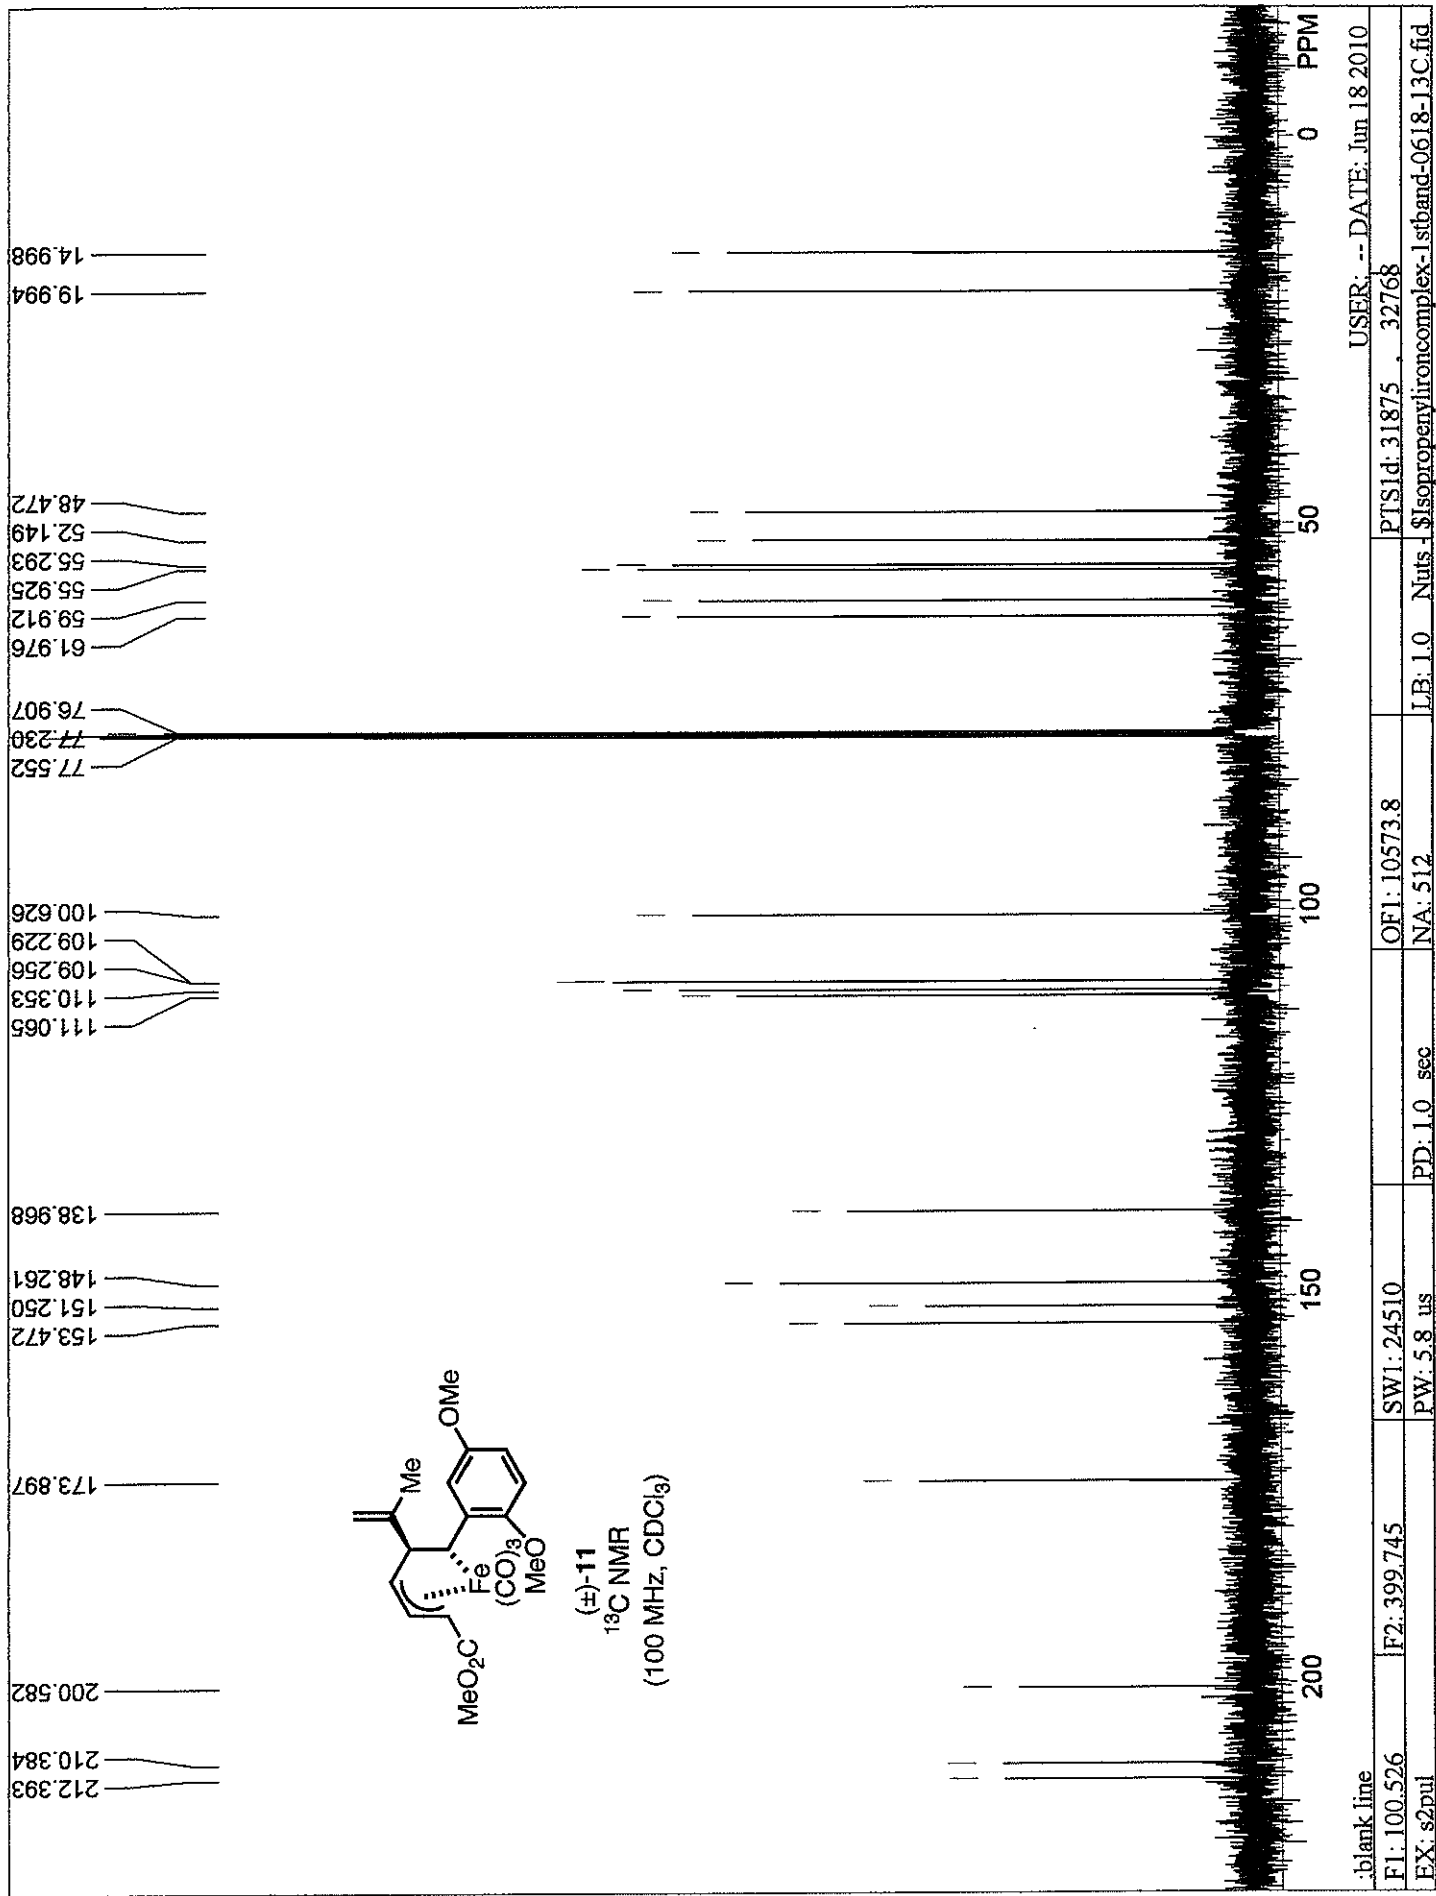

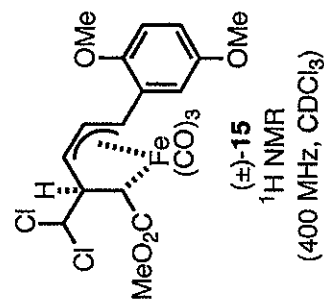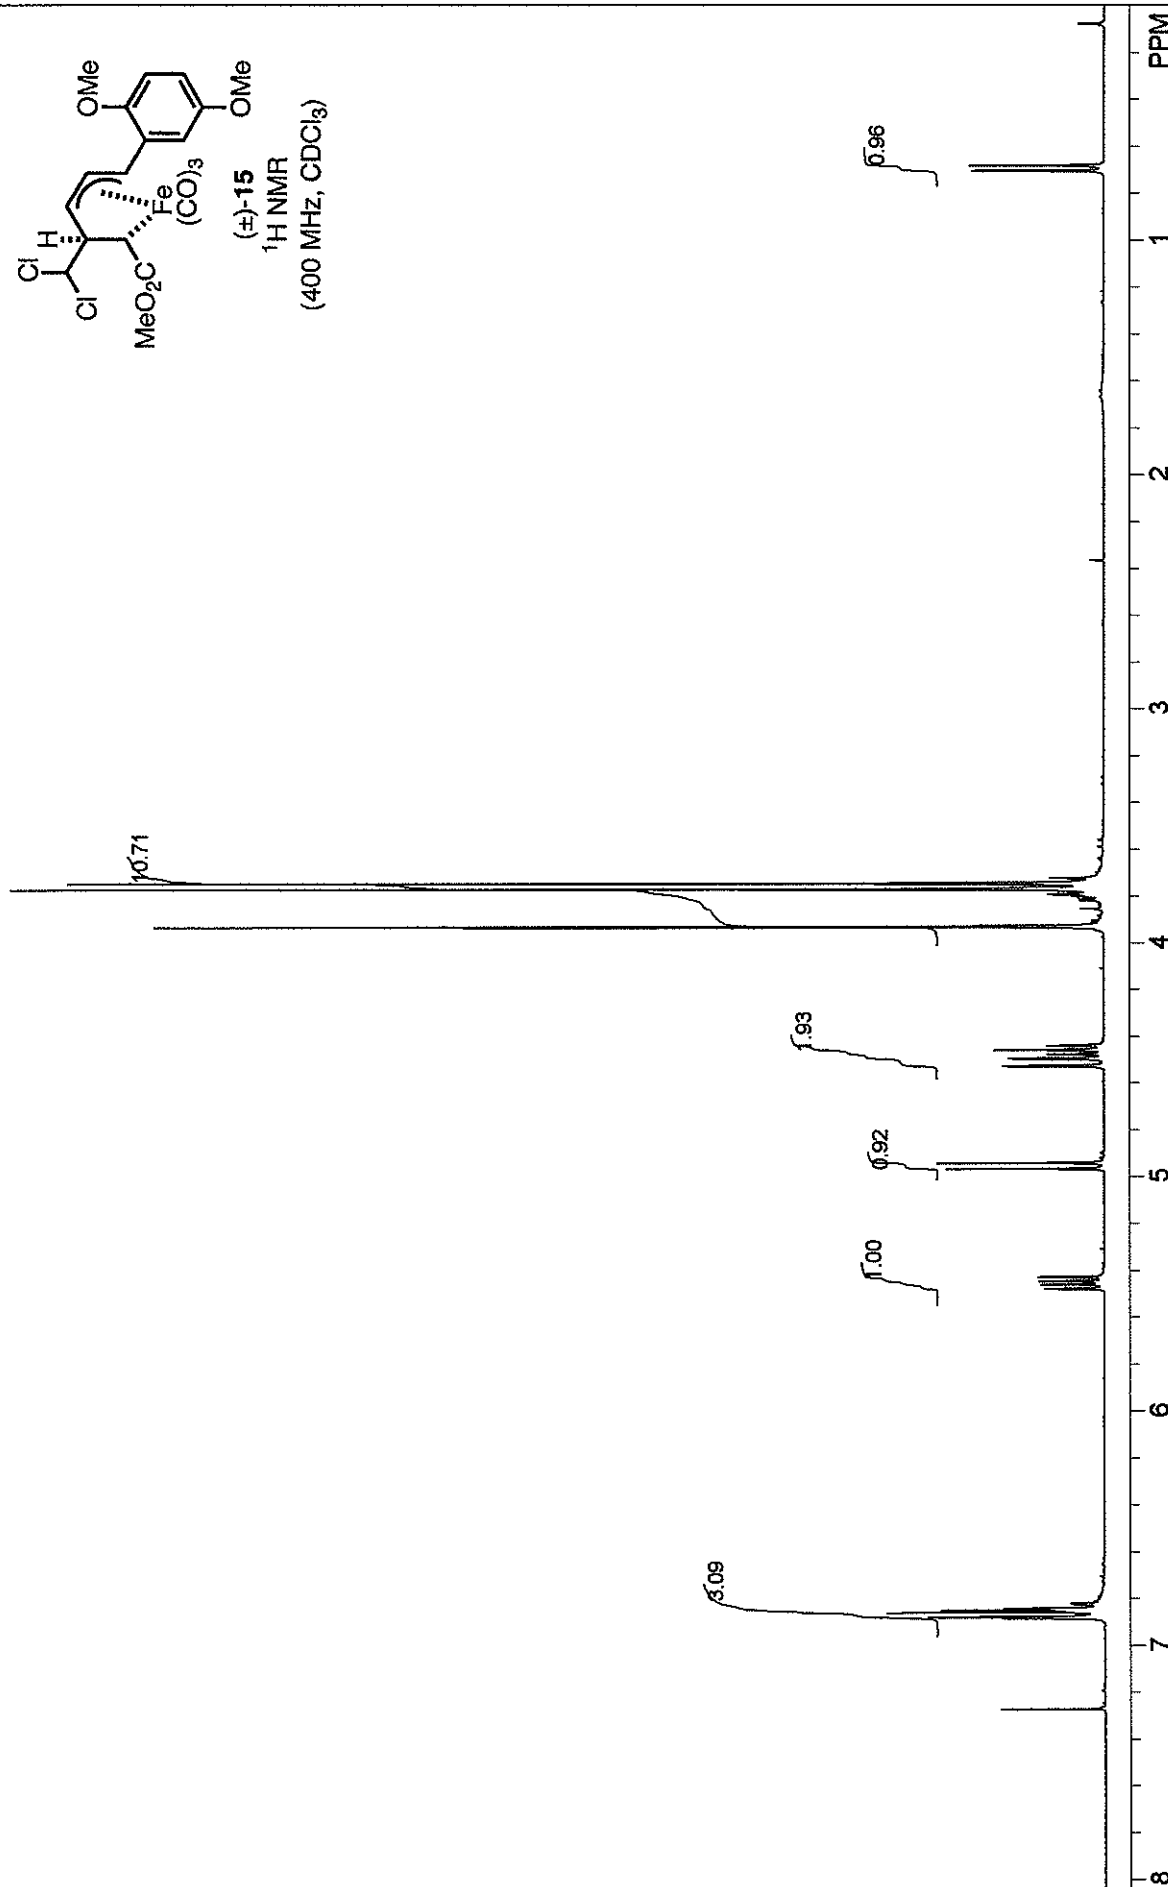

|             |             |            |             |              |                            |                            |  |
|-------------|-------------|------------|-------------|--------------|----------------------------|----------------------------|--|
| :blank line |             |            |             |              | USER: -- DATE: Aug 10 2010 |                            |  |
| F1: 399.746 | F2: 100.525 | SW1: 6410  | OF1: 2403.5 | PTS1d: 13132 | 16384                      |                            |  |
| EX: s2pul   |             | PW: 8.0 us | PD: 1.0 sec | NA: 8        | LB: 0.0                    | Nuts - \$dlee0810-1-1H.fid |  |

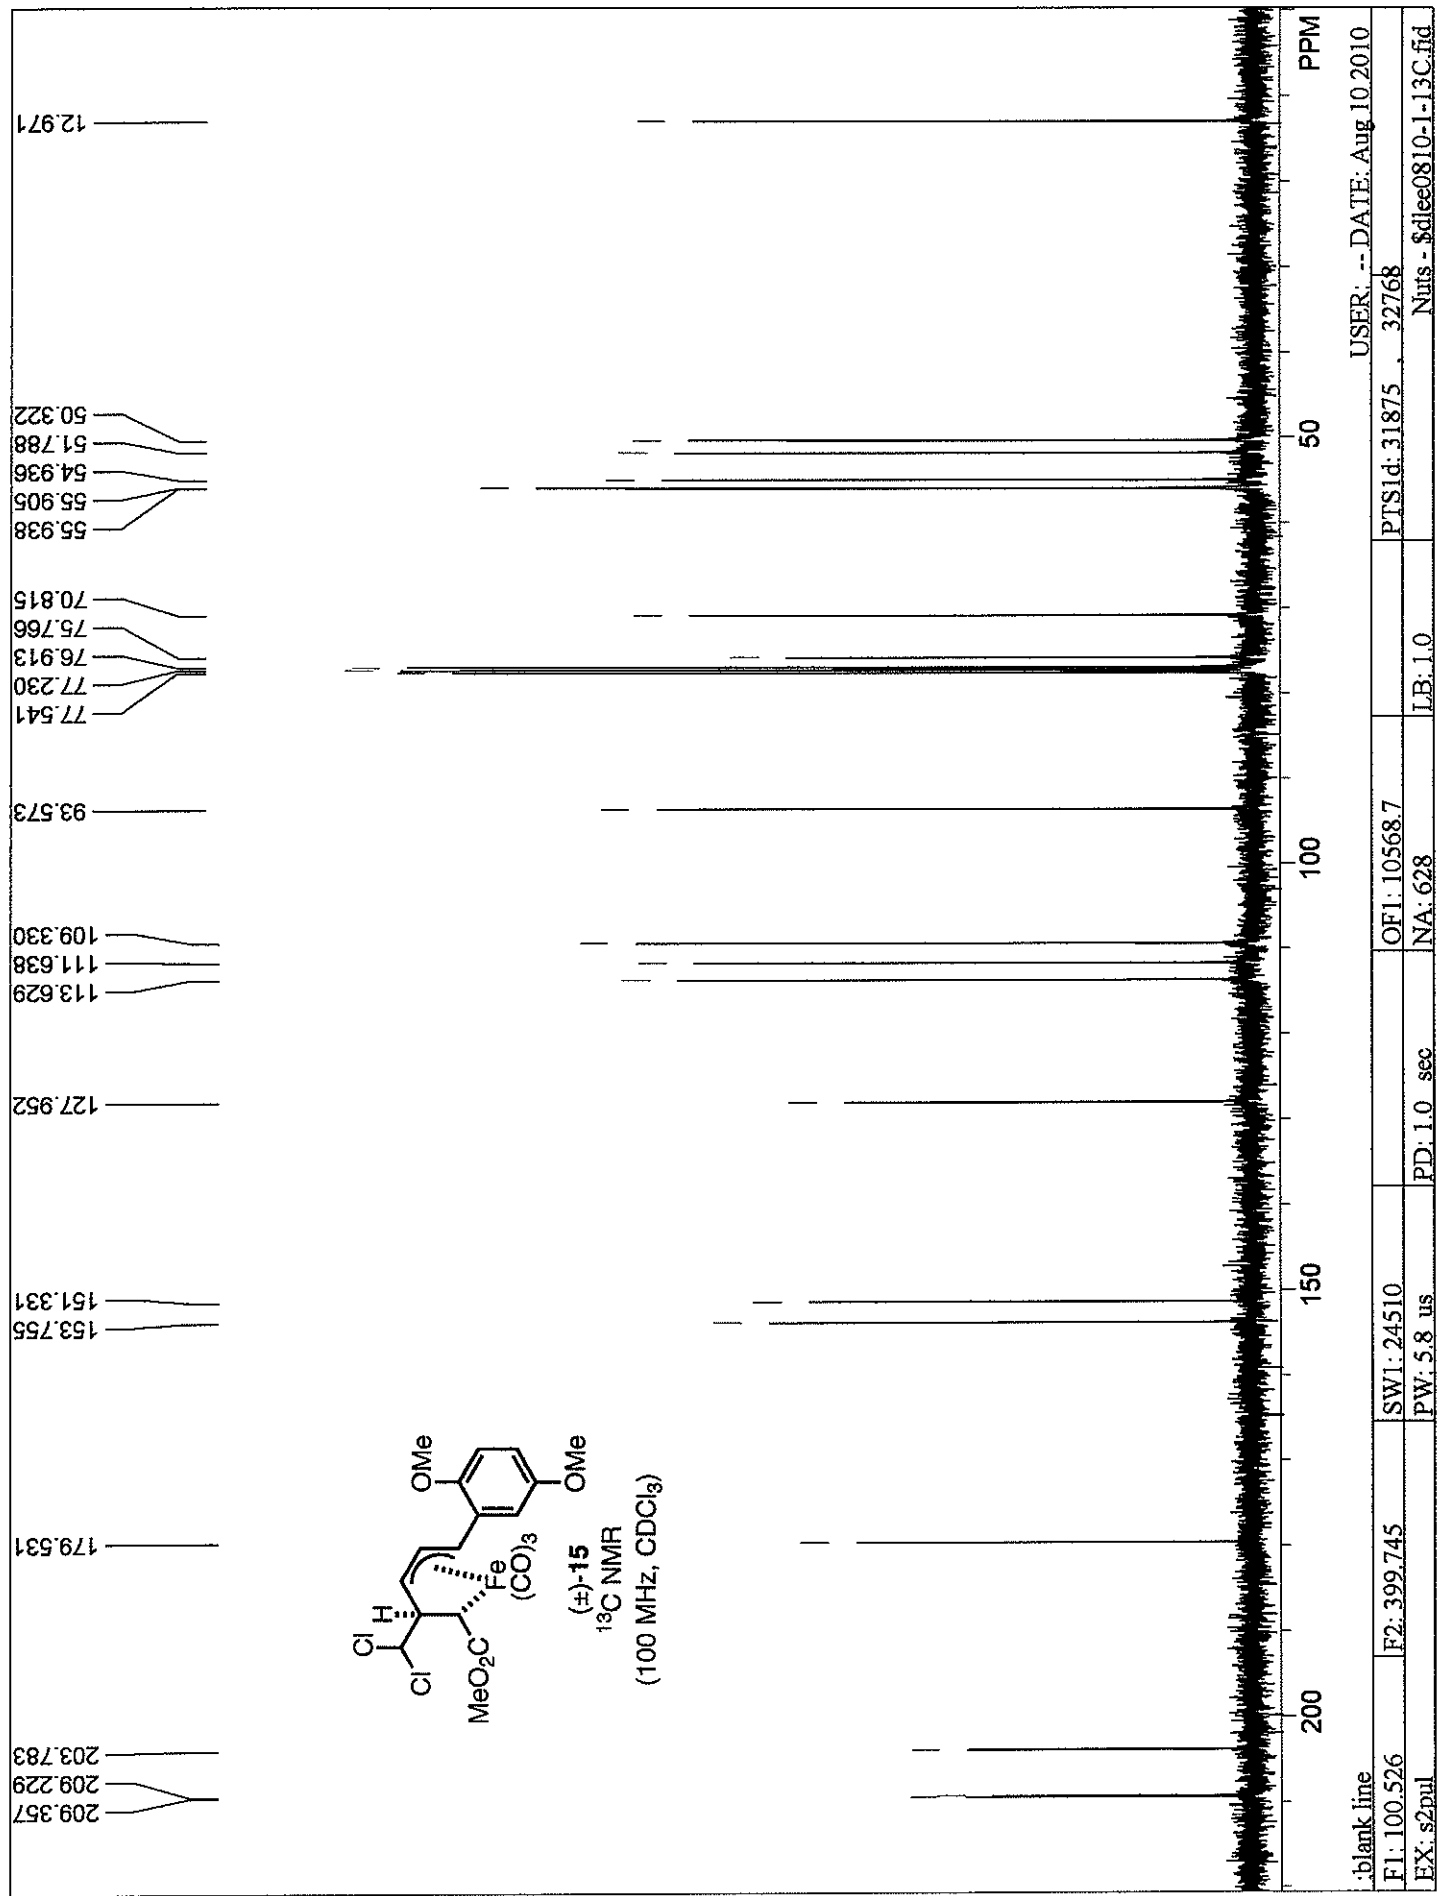

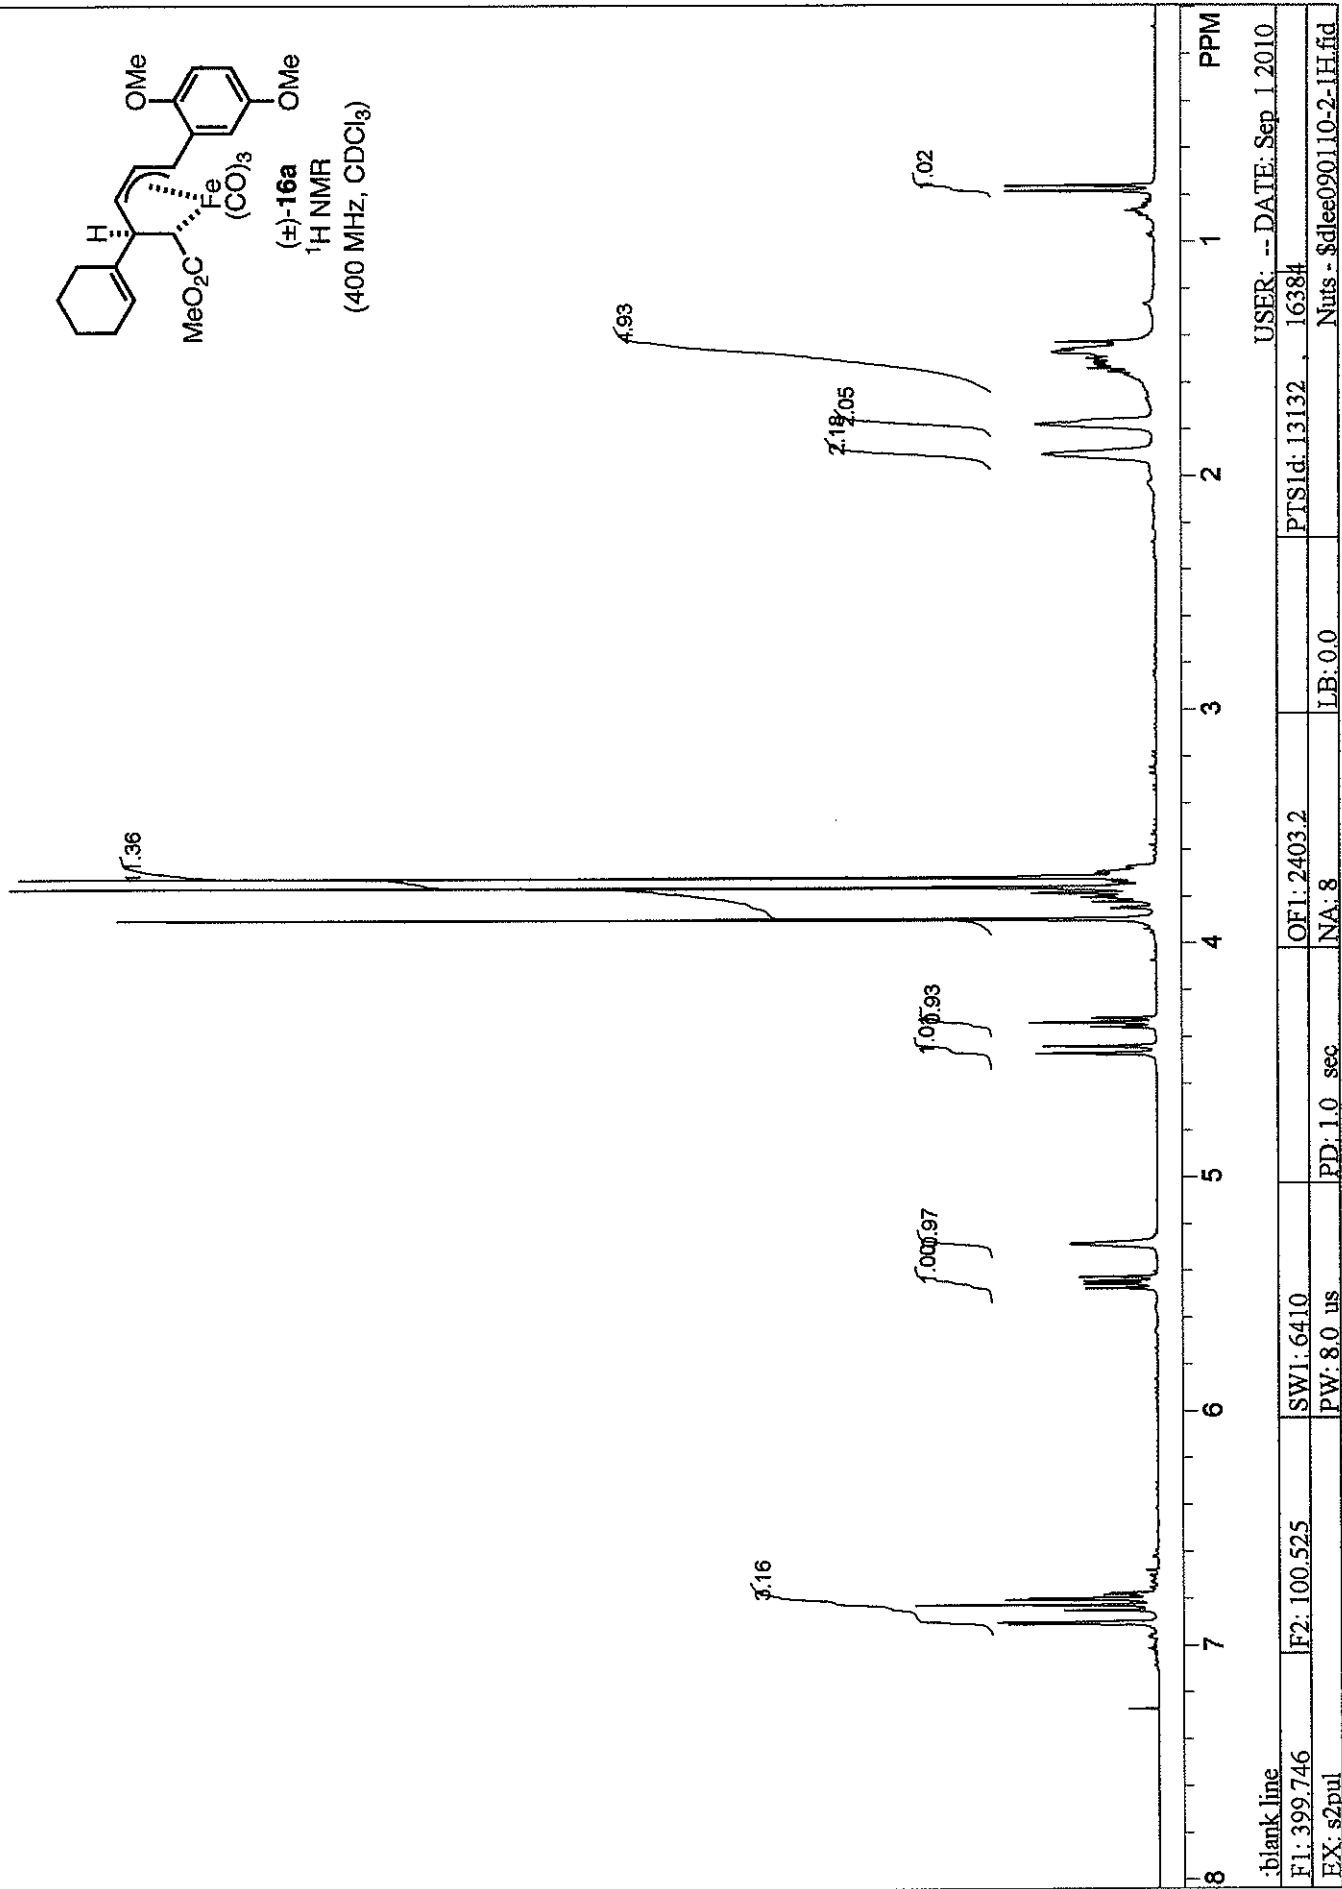

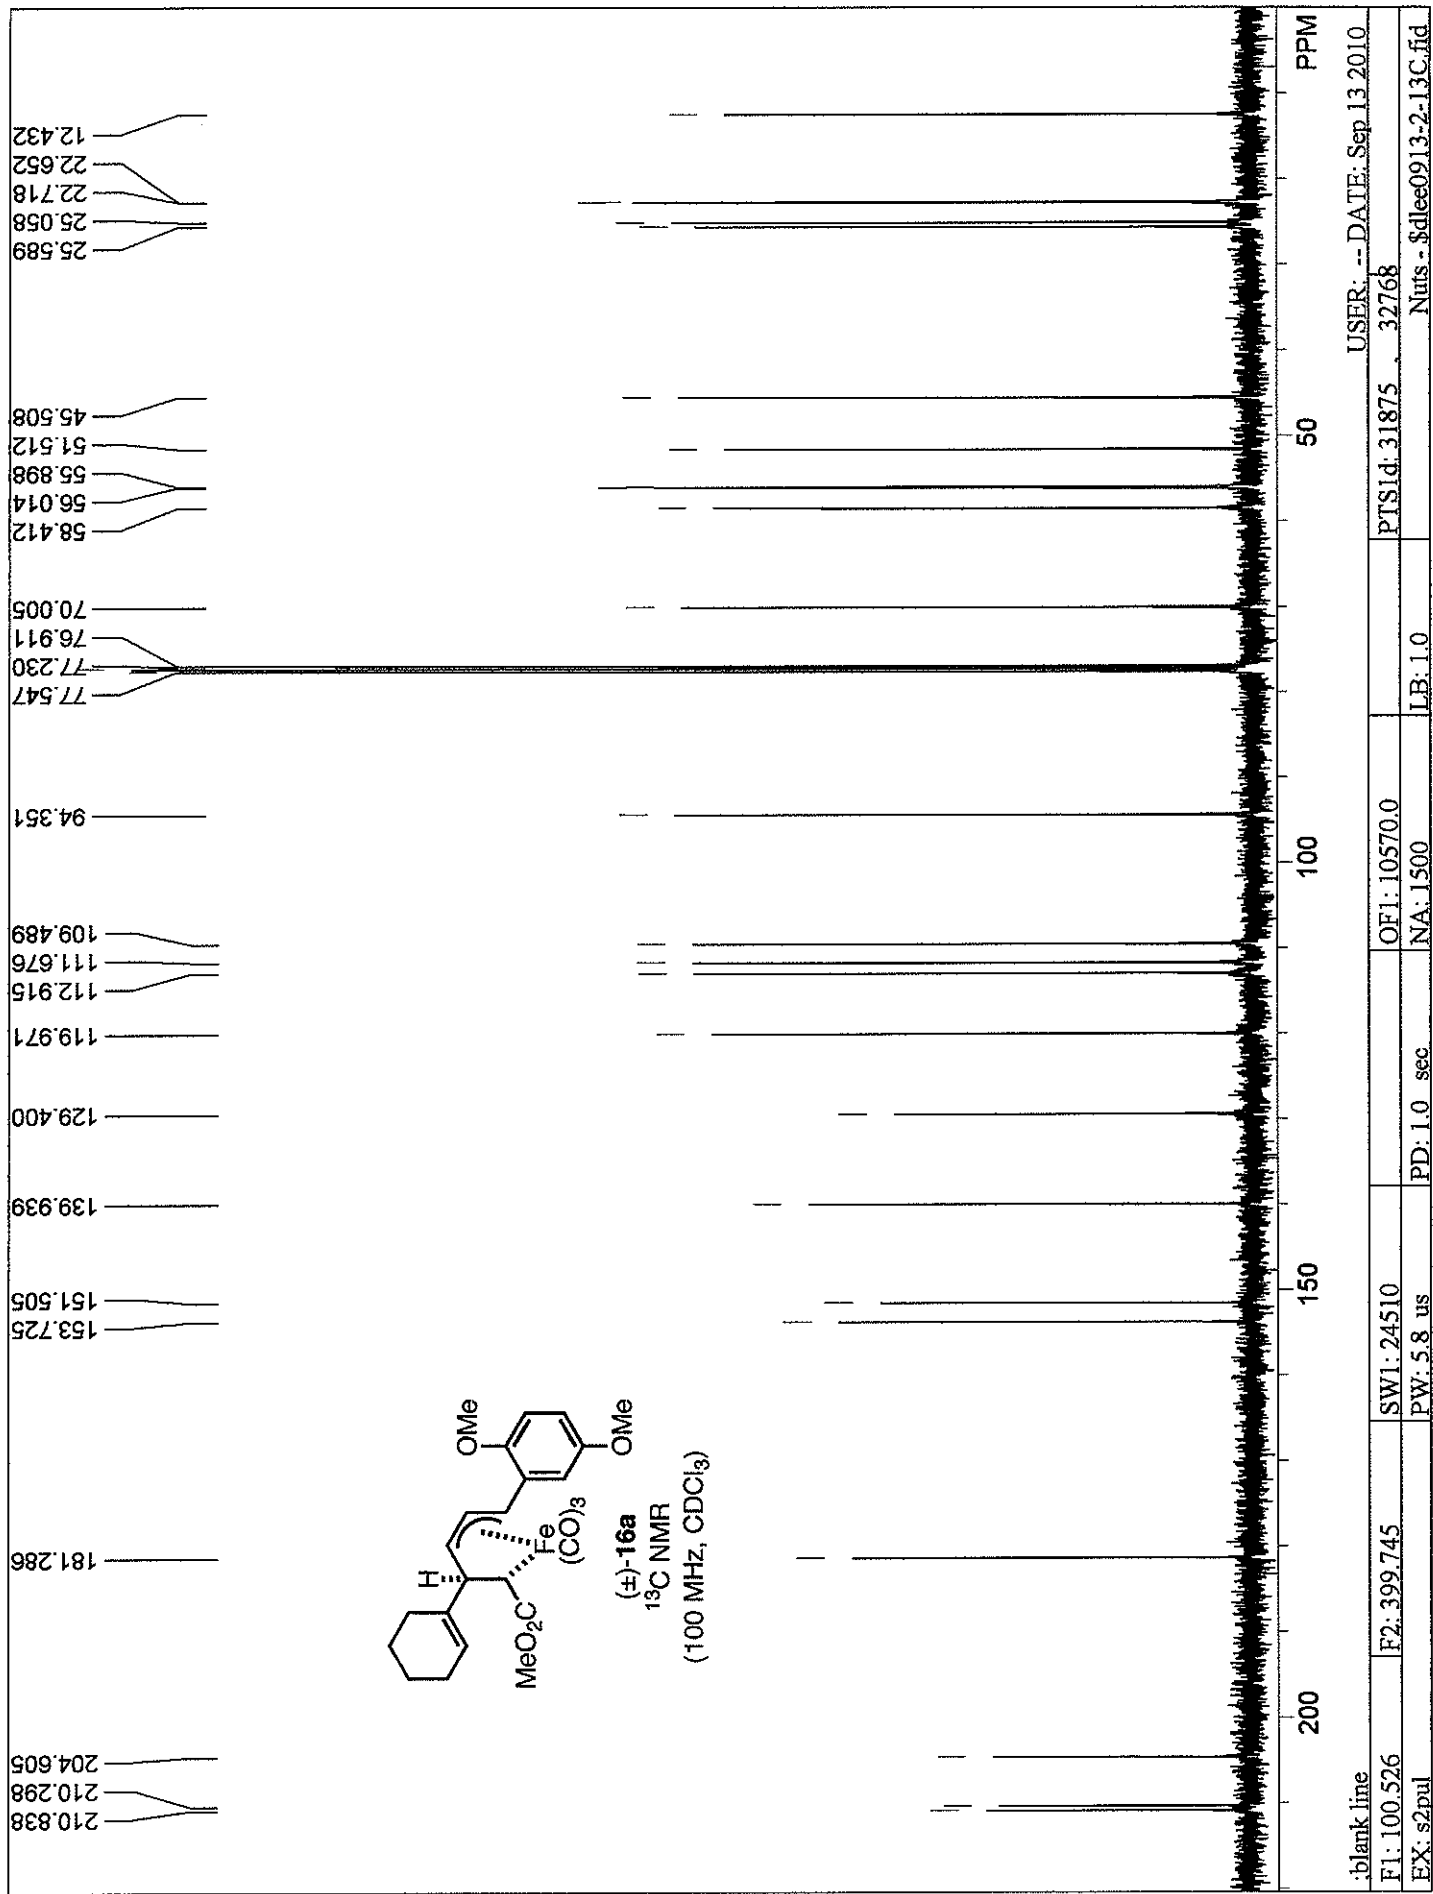

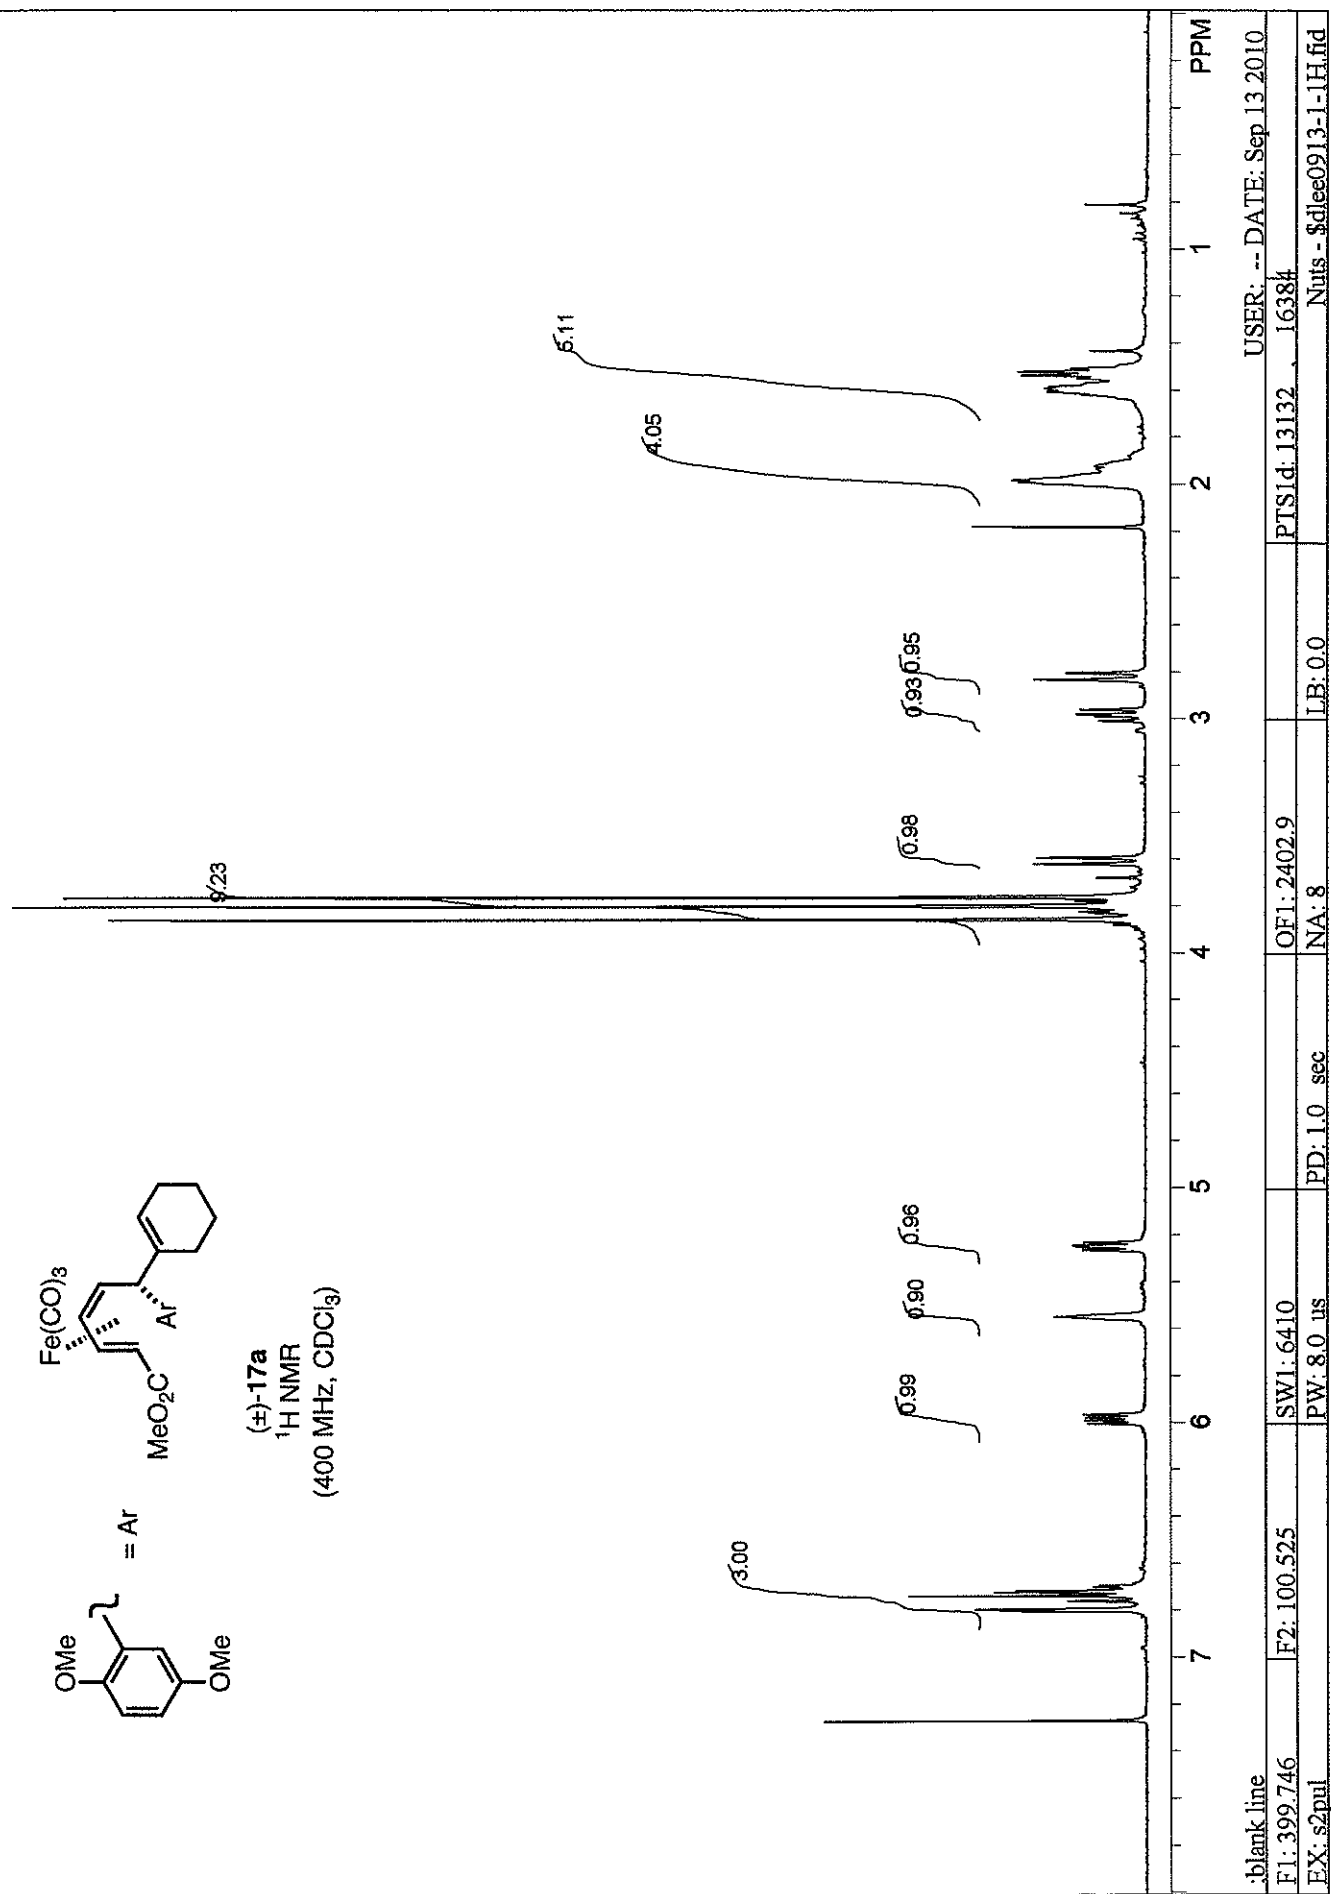

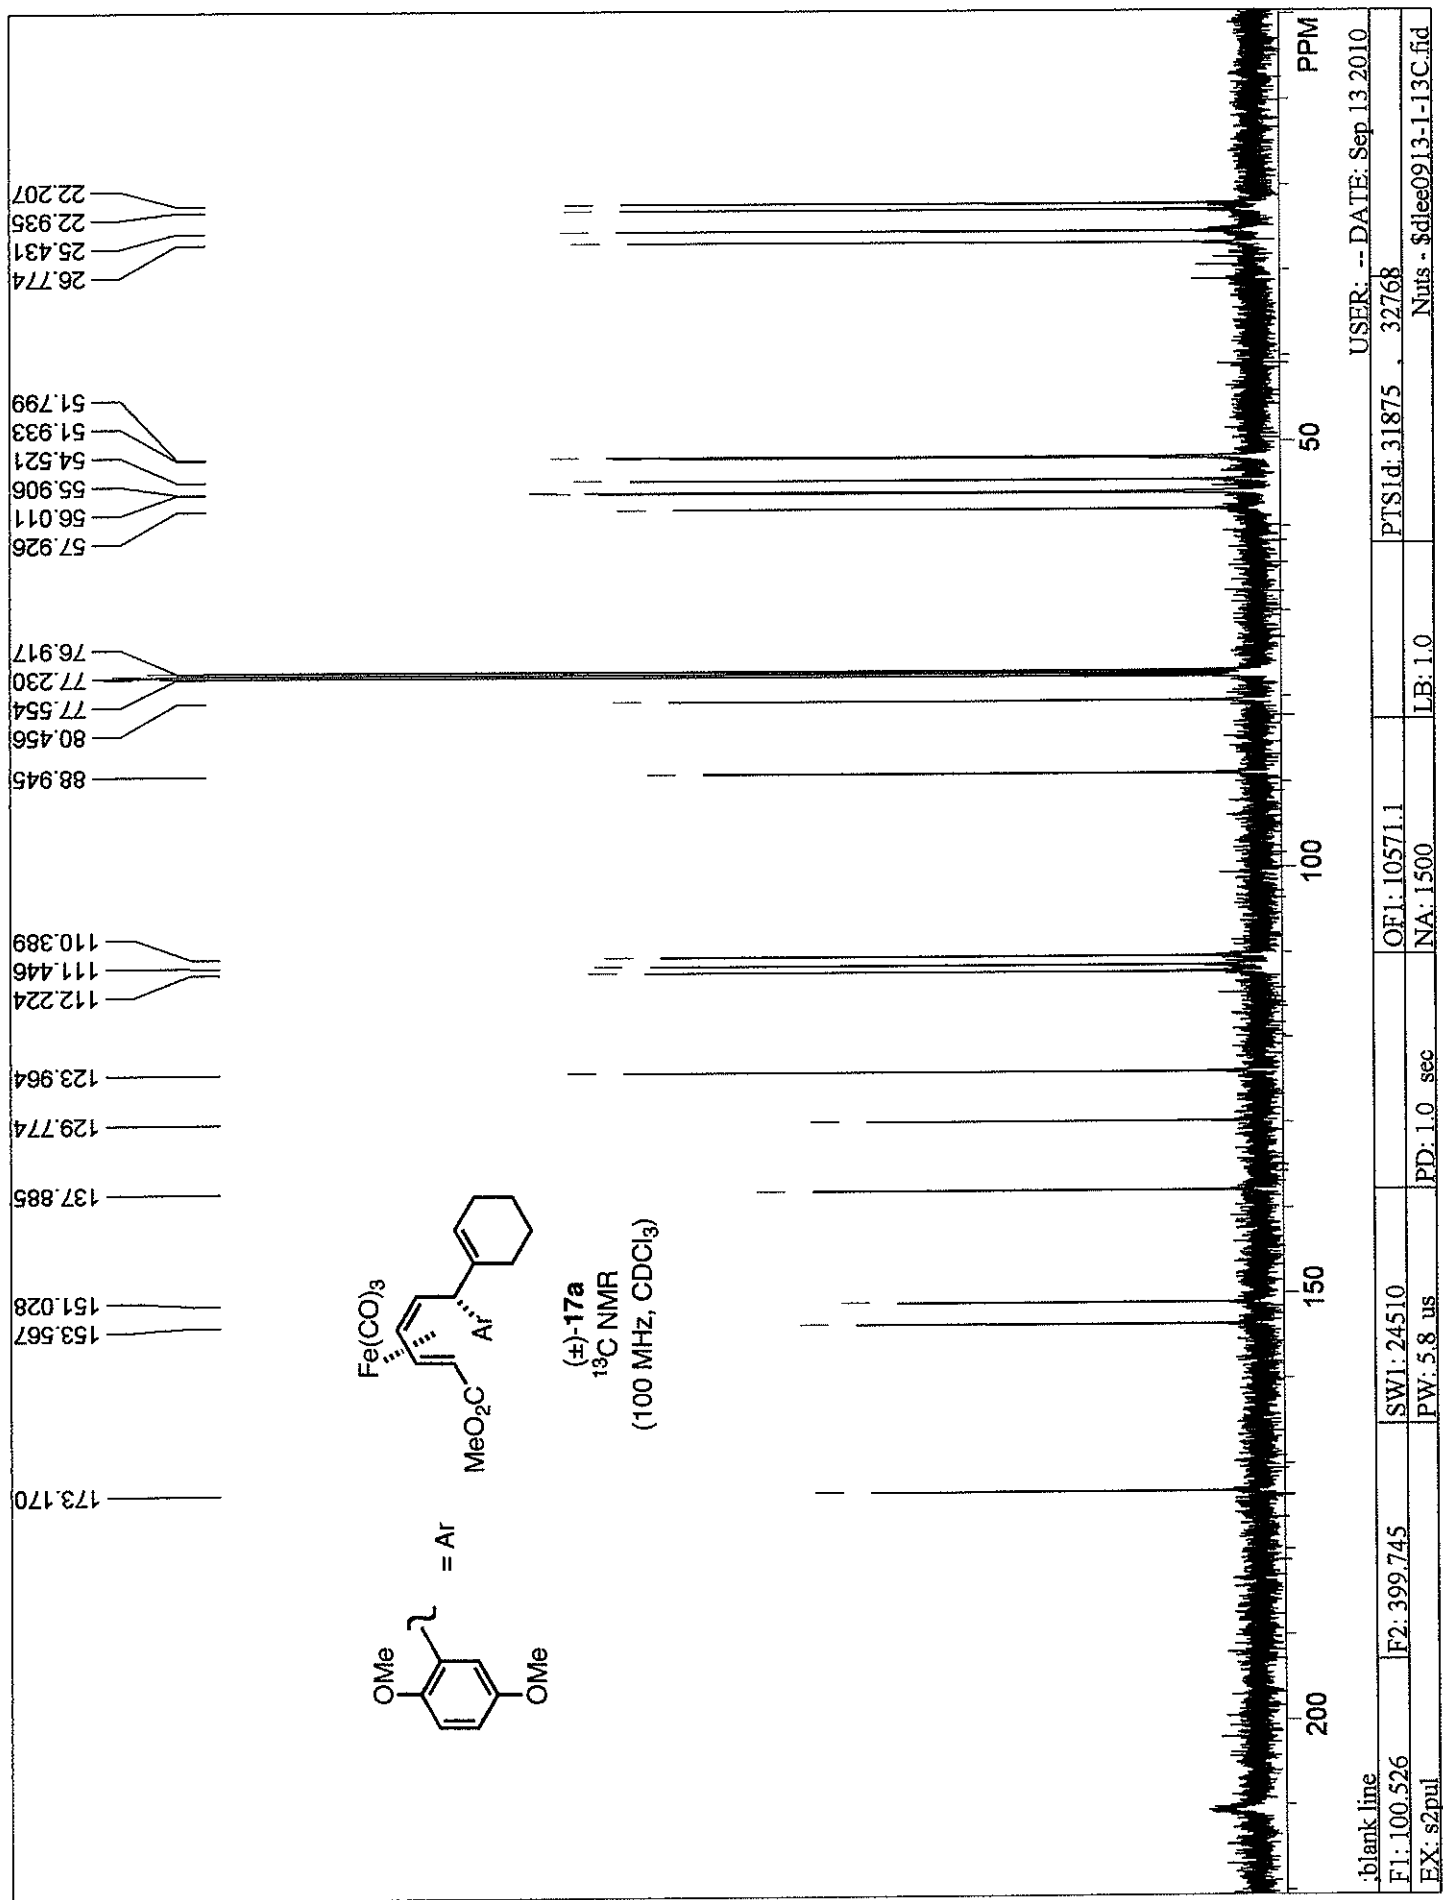

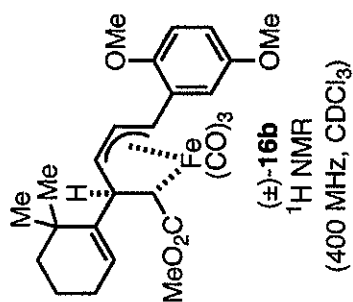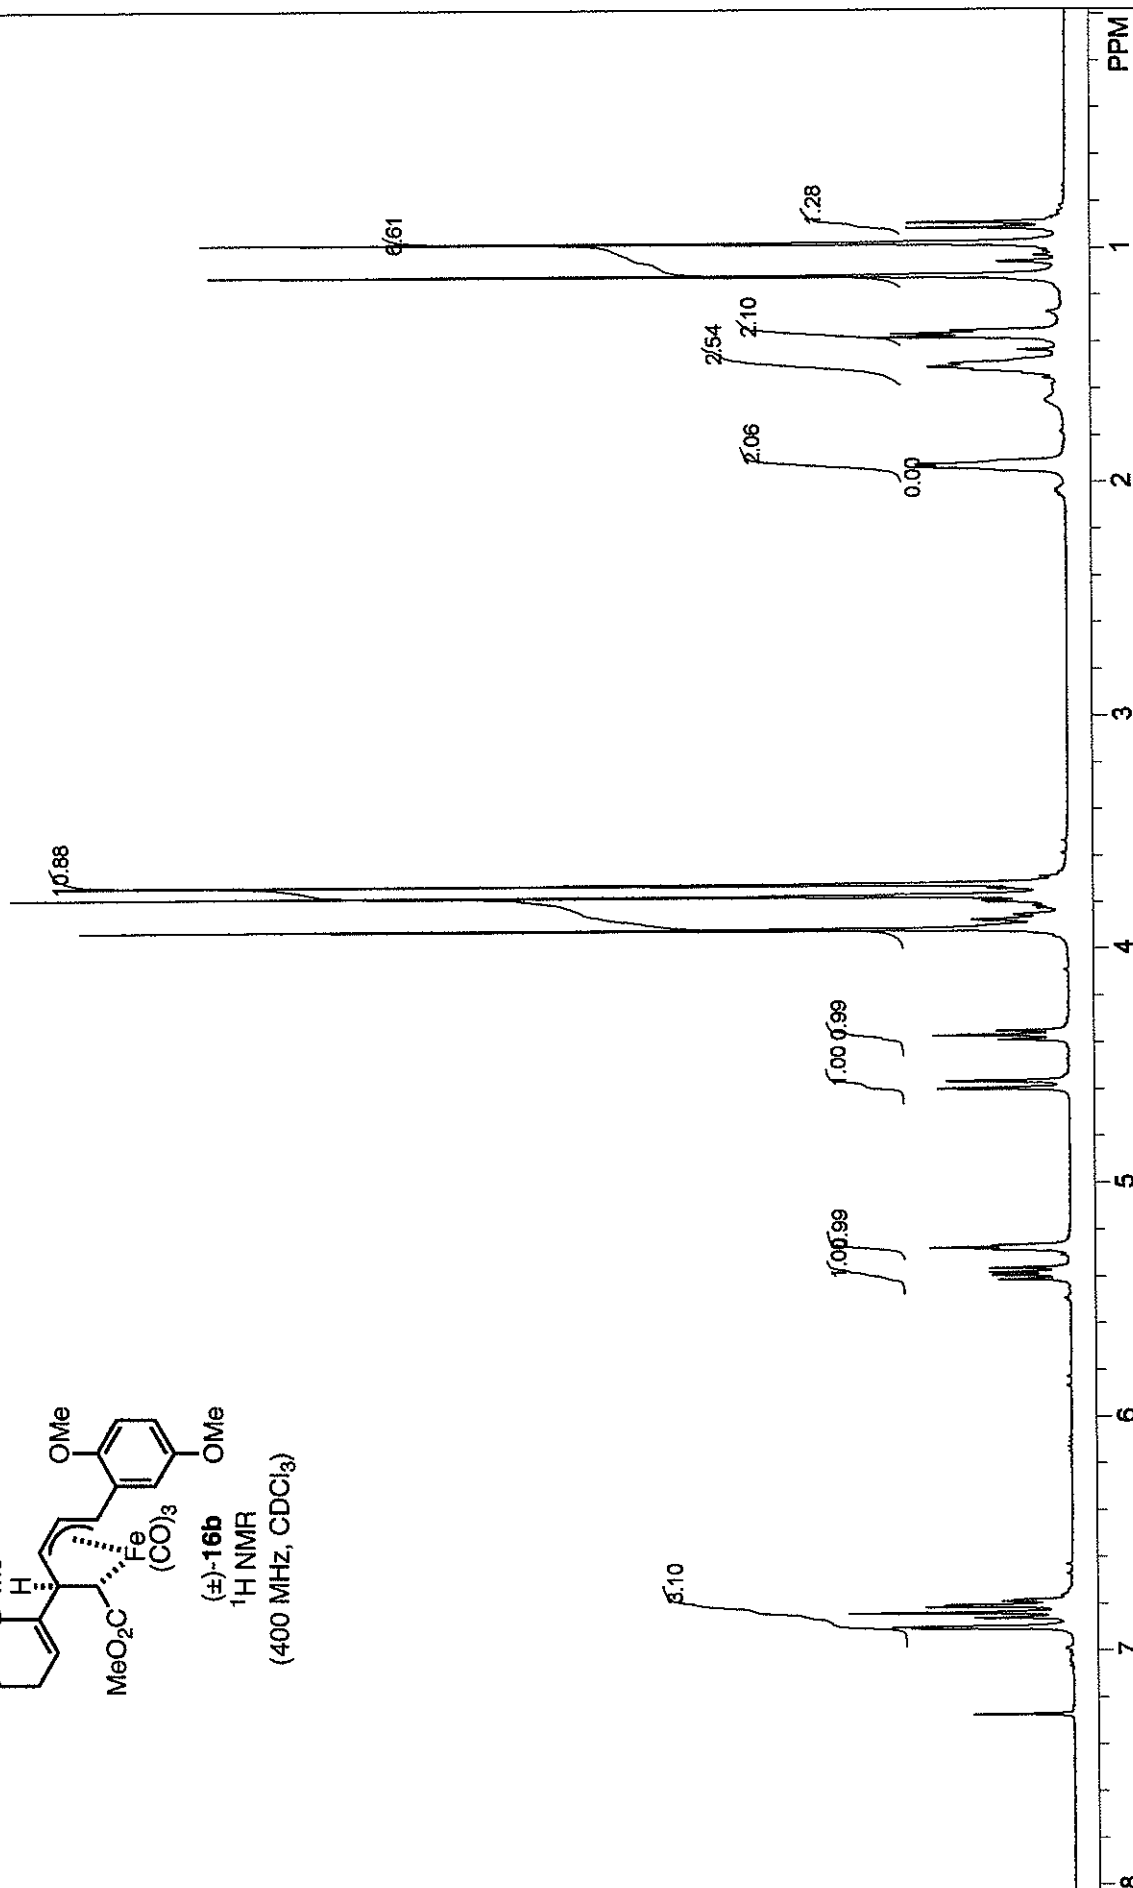

|             |                             |
|-------------|-----------------------------|
| .blank line | USER: -- DATE: Nov 8 2010   |
| F1: 399.746 | PTSId: 13132                |
| F2: 100.525 | 16384                       |
| EX: s2pul   | NA: 8                       |
|             | LB: 0.0                     |
|             | Nuts - \$dlee10810-2-1H.fid |



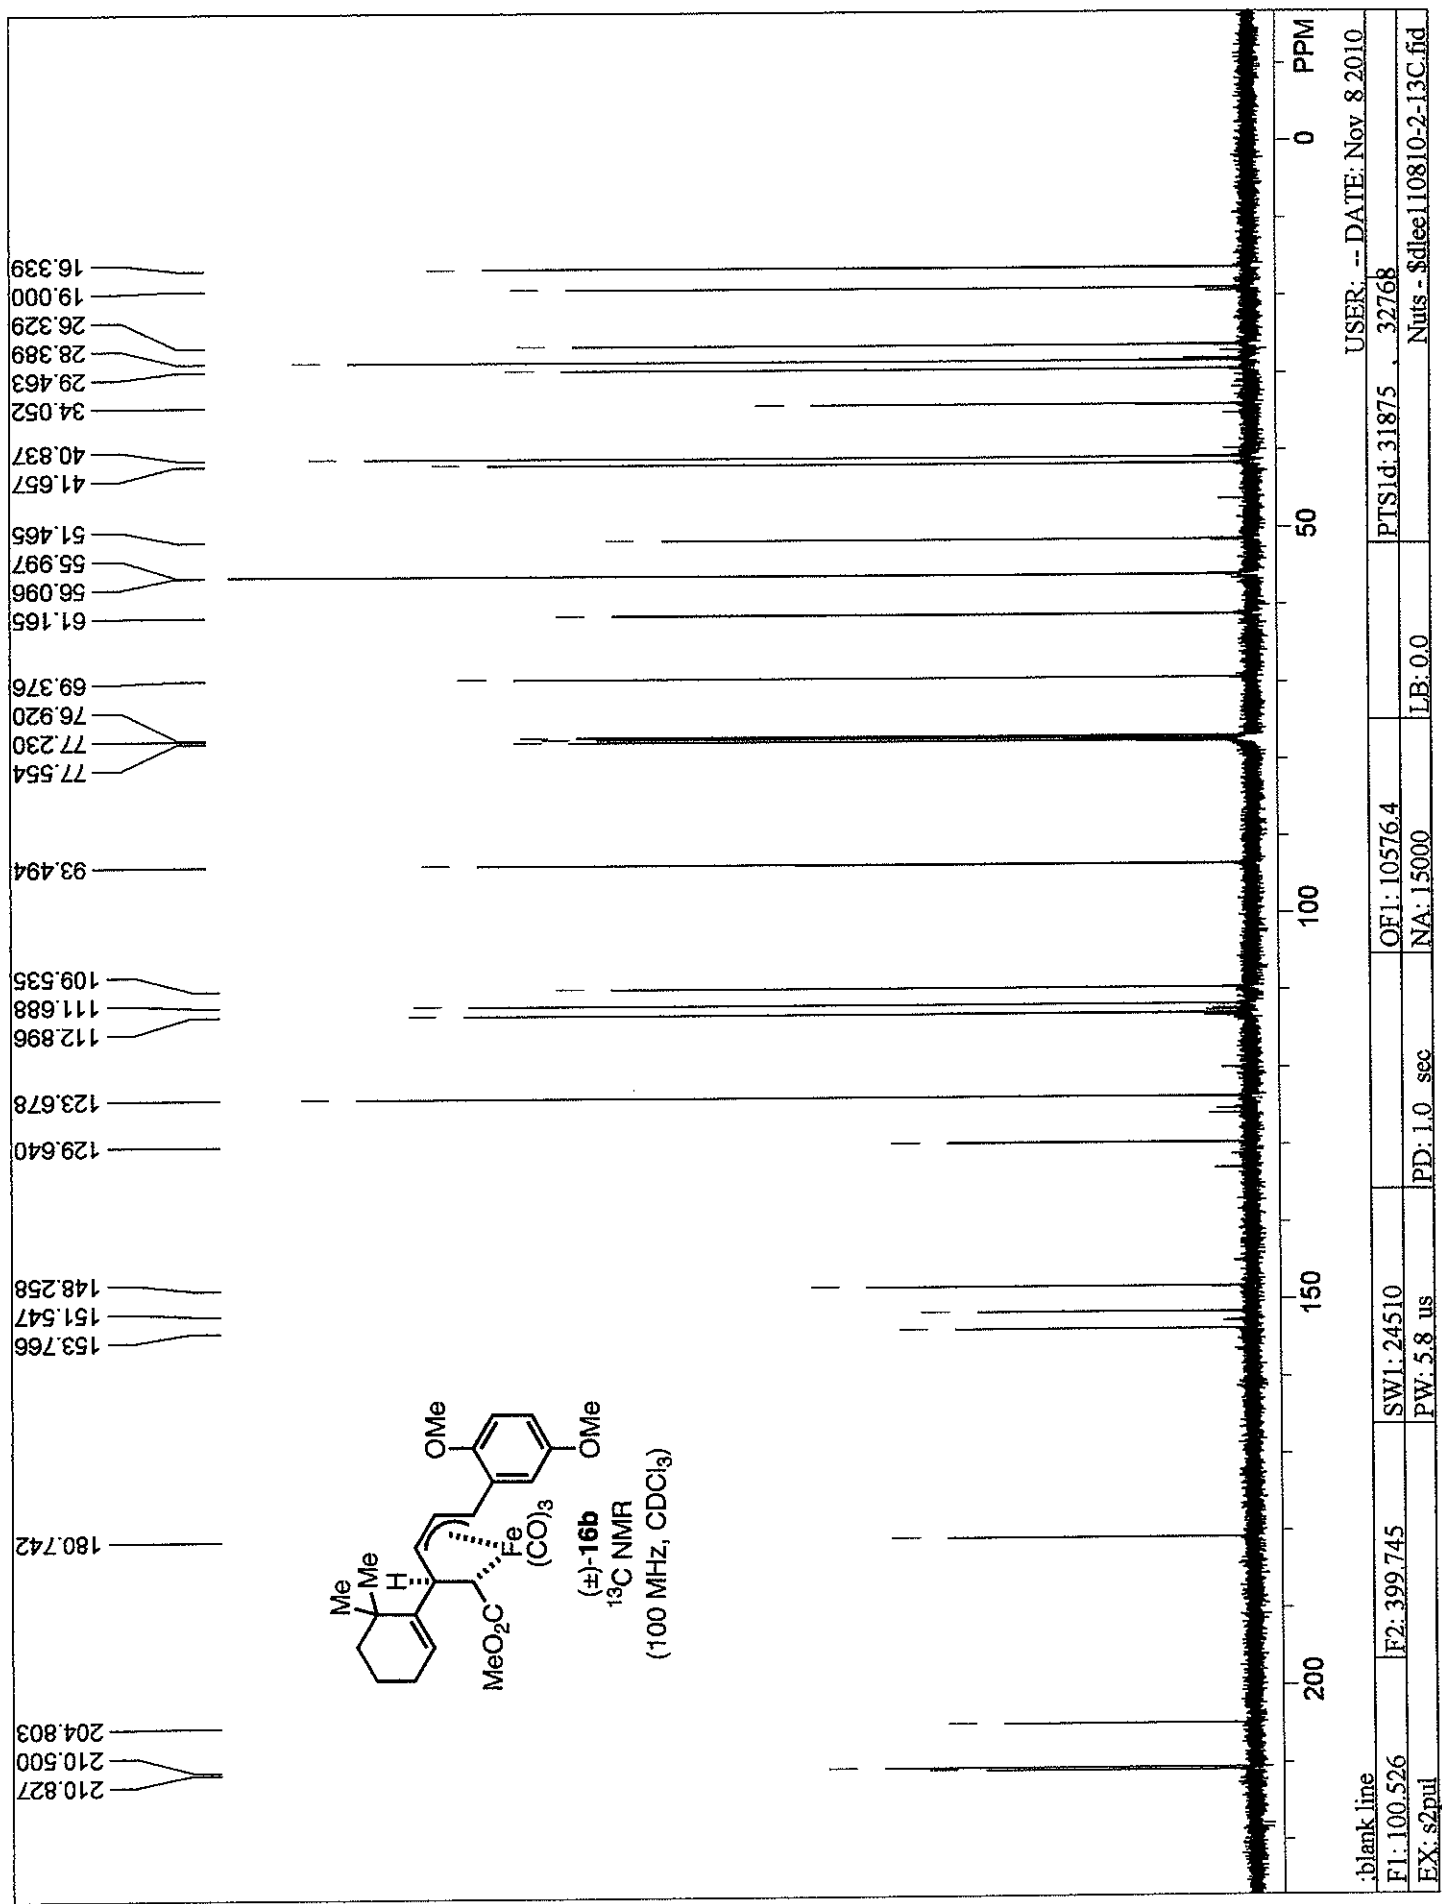

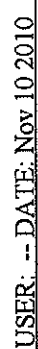

|                             |       |
|-----------------------------|-------|
| PTSD: 13132                 | 16384 |
| PTSId: 13132                | 16384 |
| OF1: 2402.9                 |       |
| SW1: 6410                   |       |
| F2: 100.525                 |       |
| F1: 399.746                 |       |
| PD: 1.0 sec                 |       |
| NA: 8                       |       |
| LB: 0.0                     |       |
| PD: 1.0 sec                 |       |
| PW: 8.0 us                  |       |
| EX: s2pul                   |       |
| Nuts - \$dlee11010-1-1H.fid |       |

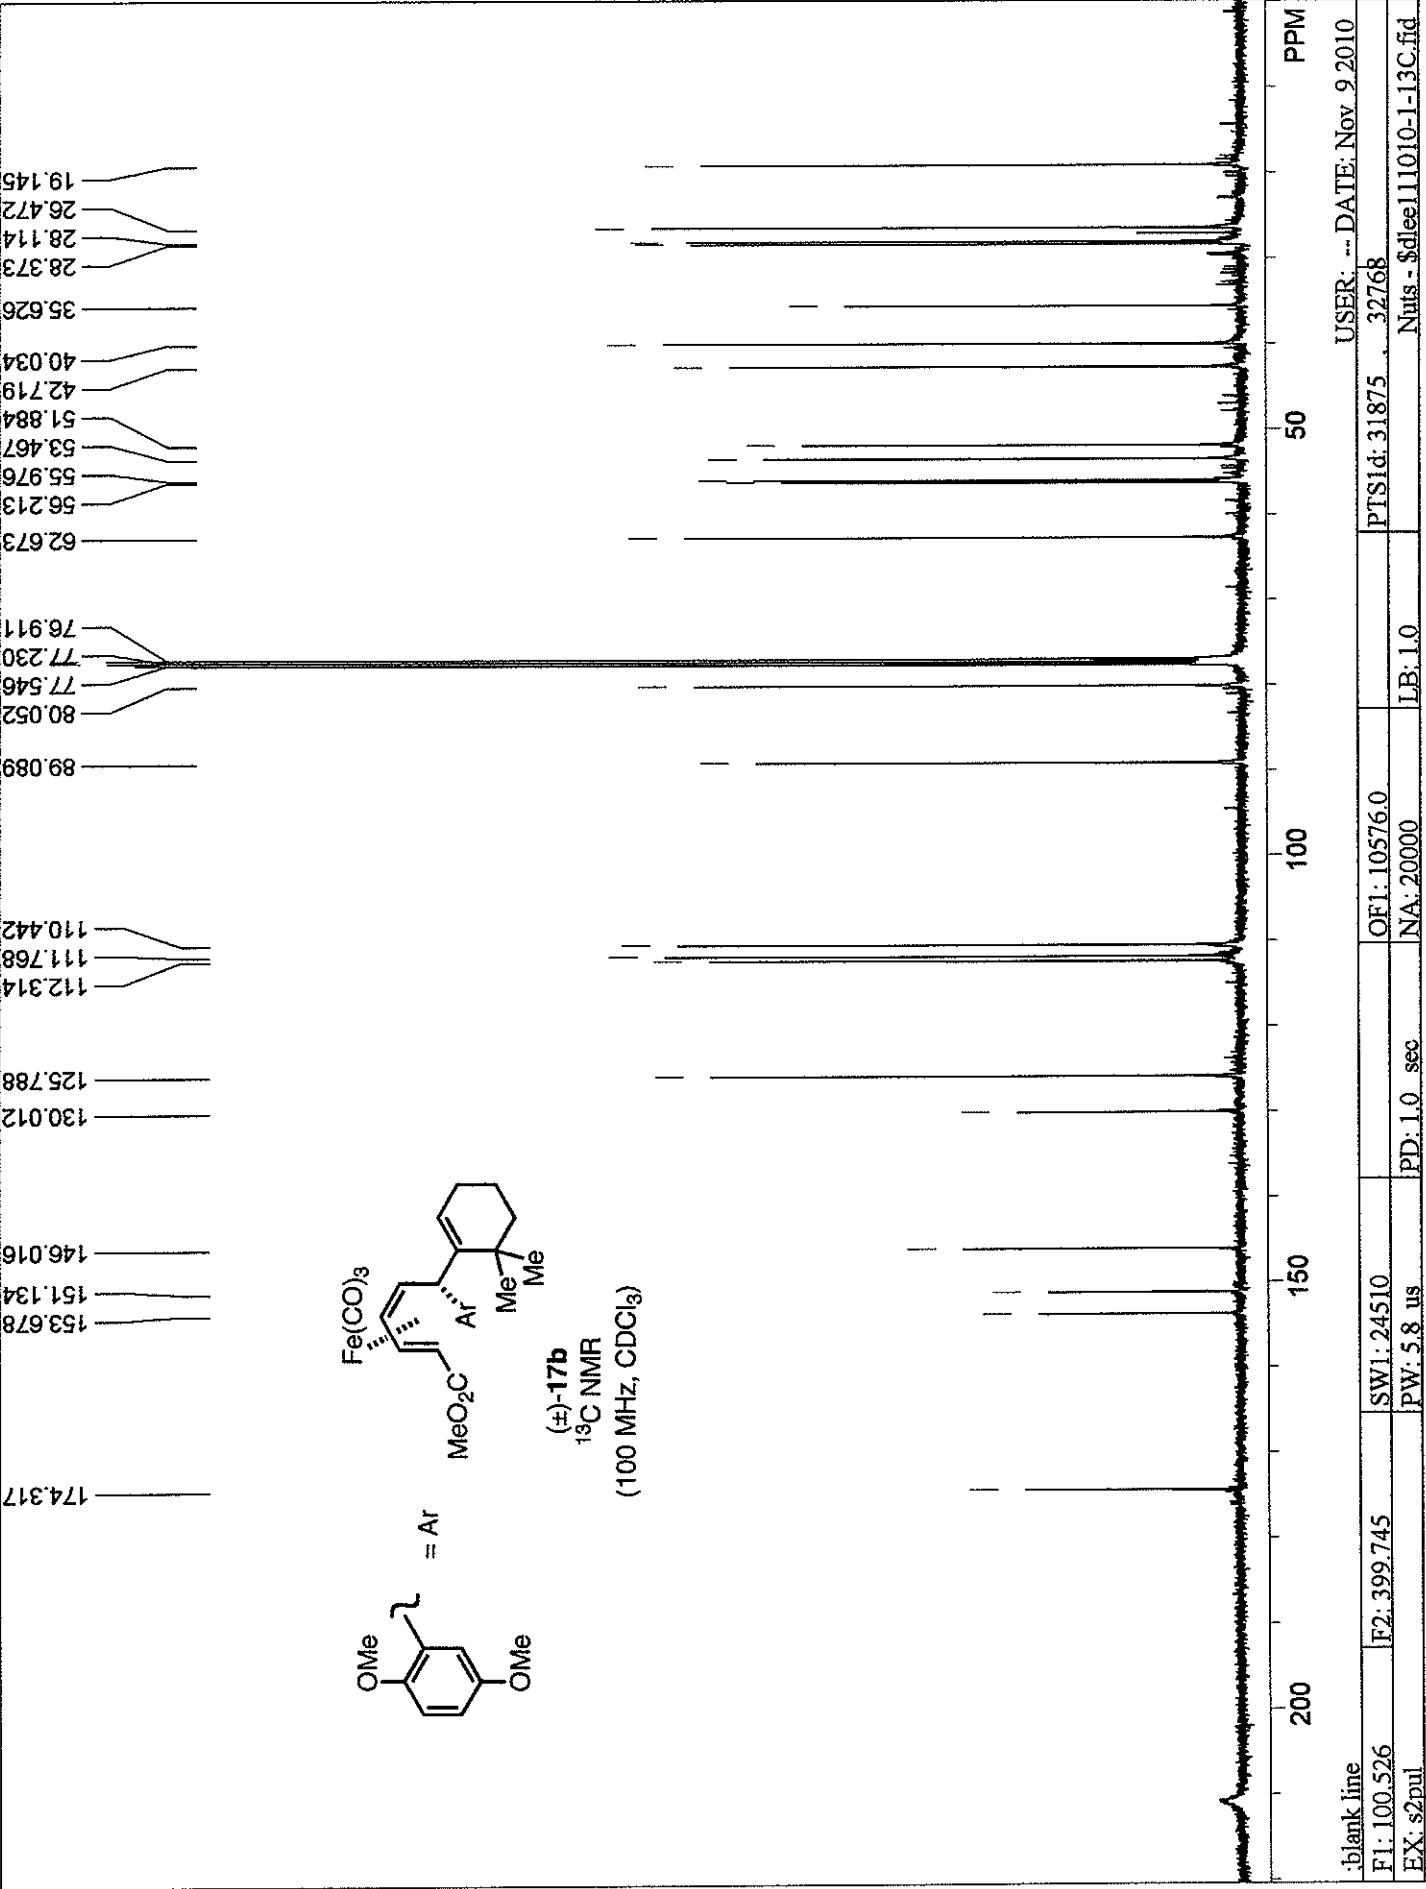

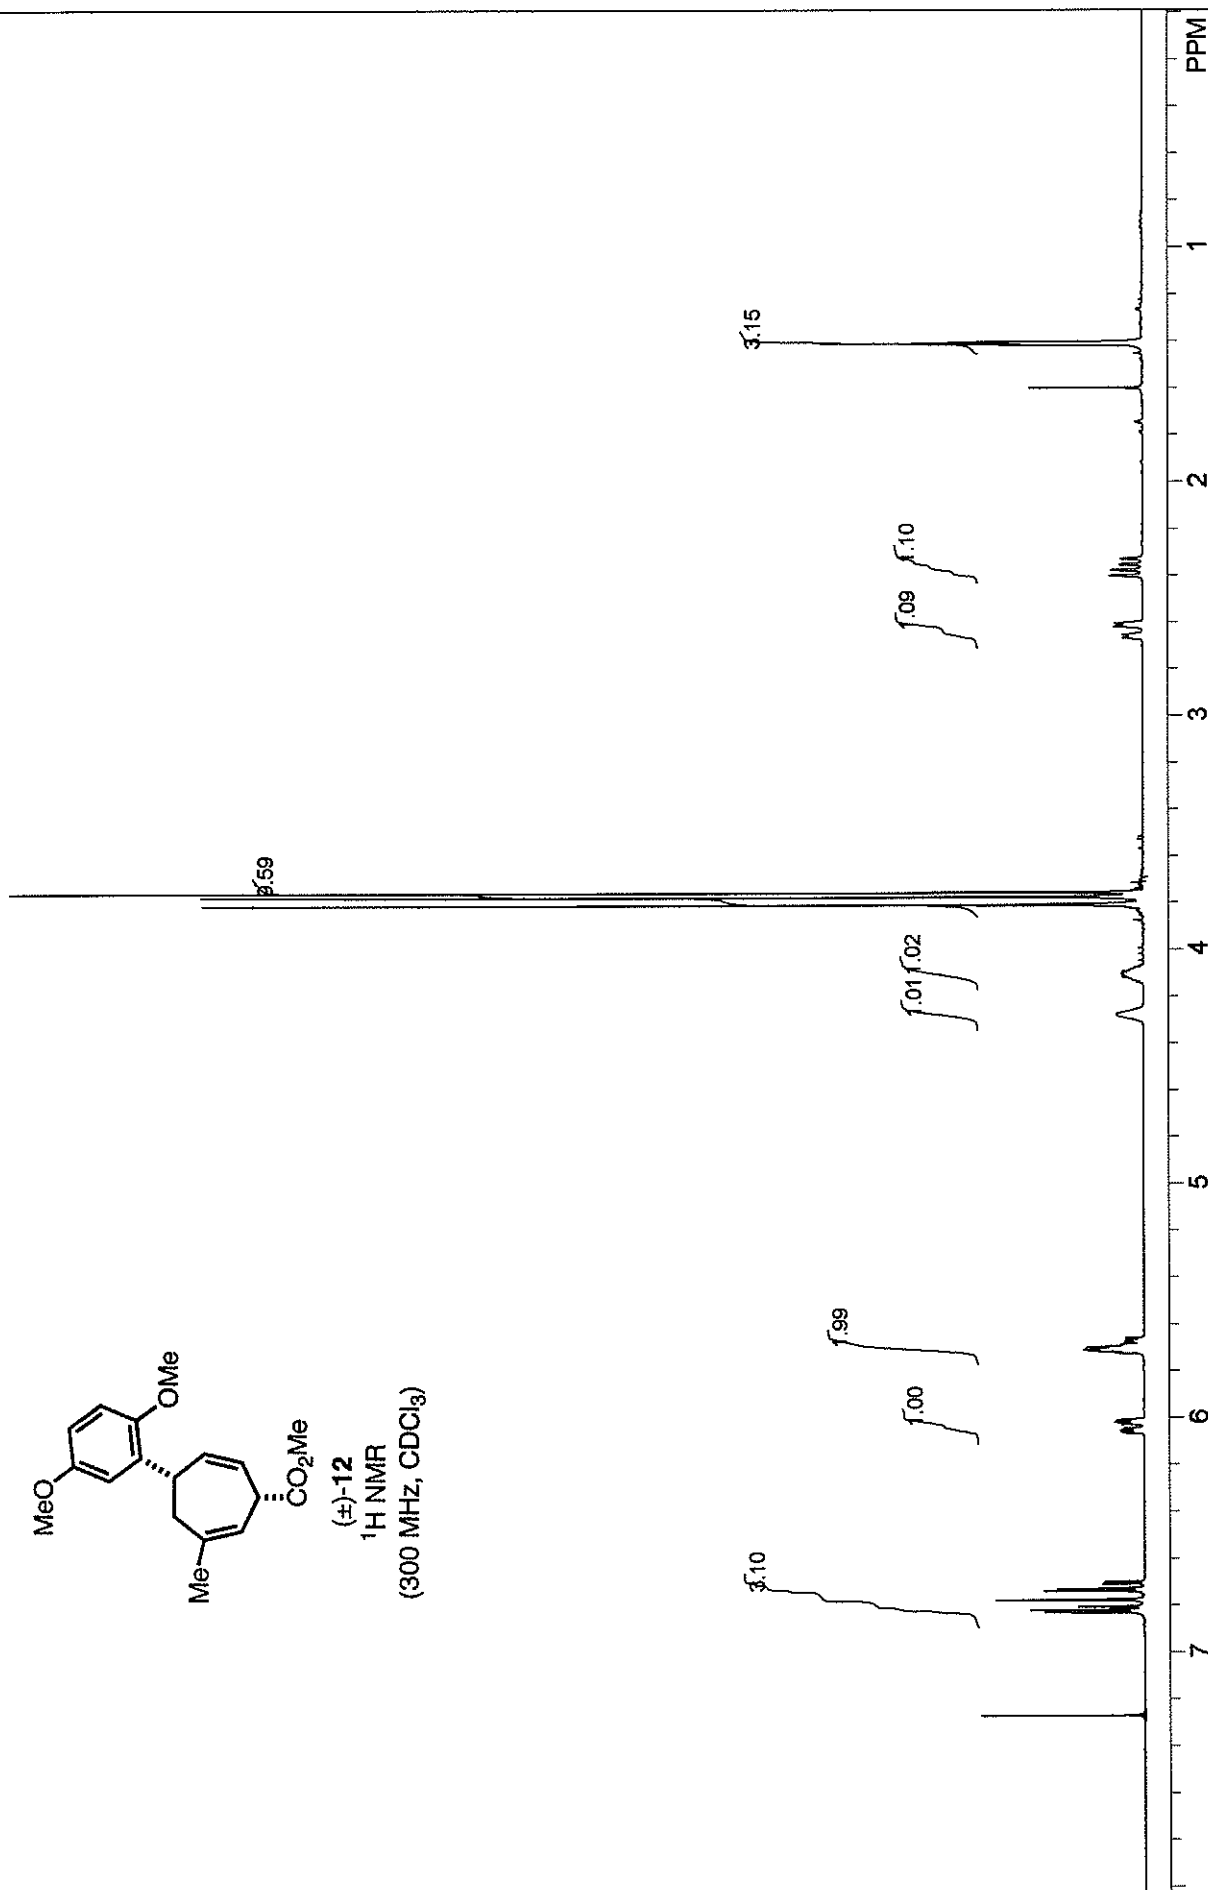

STANDARD 1H OBSERVE:blank line

|             |            |            |             |             |         |                            |
|-------------|------------|------------|-------------|-------------|---------|----------------------------|
| F1: 300.136 | F2: 75.476 | SW1: 4803  | OF1: 1803.8 | PTSId: 9596 | 16384   | USER: -- DATE: May 29 2008 |
| EX: s2pul   |            | PW: 6.3 us | PD: 1.0 sec | NA: 8       | LB: 0.0 | Nuts: - \$gi-229.fid       |

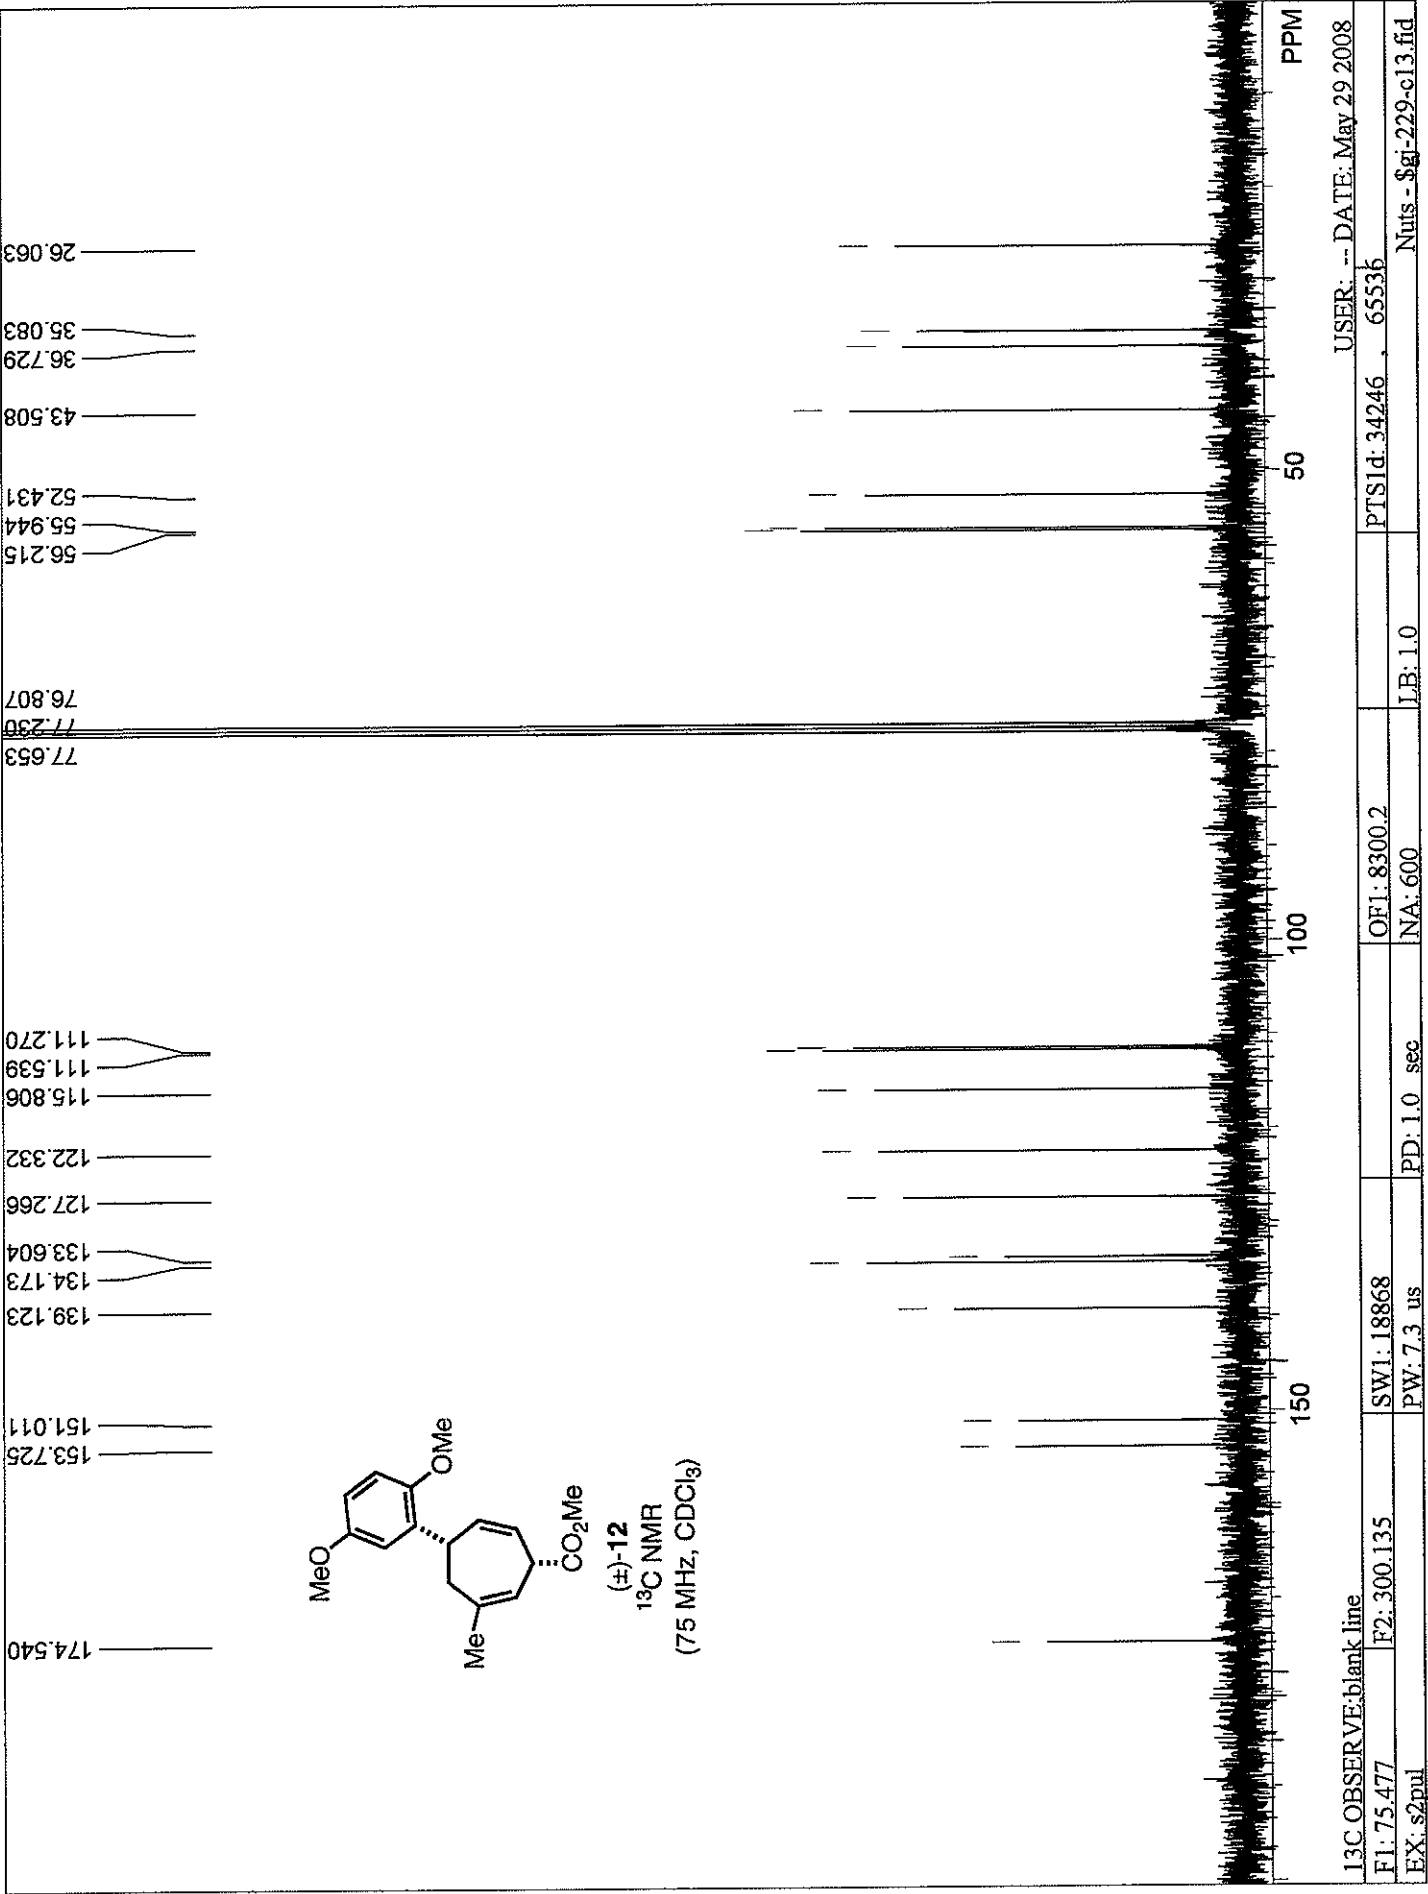

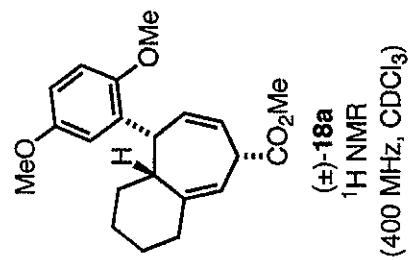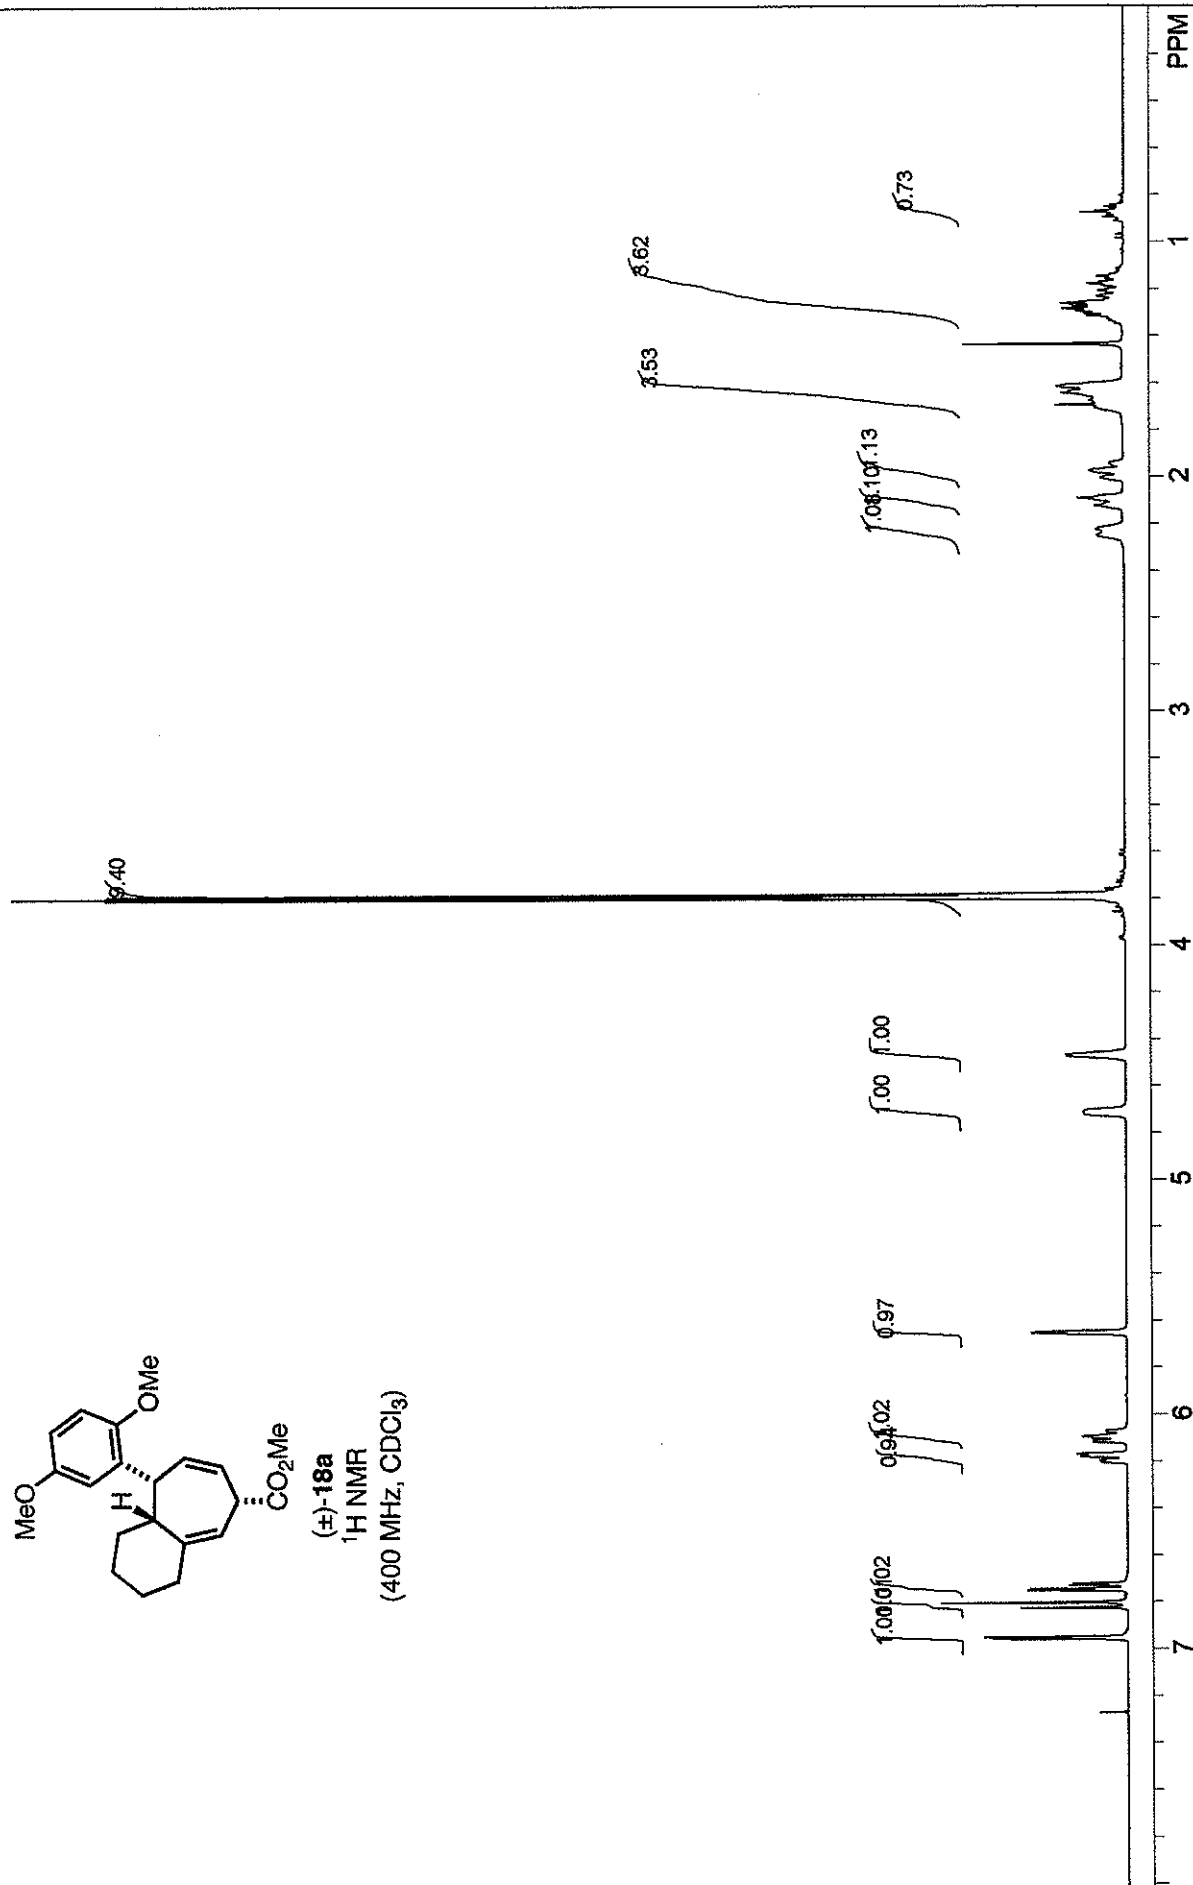

|             |             |            |             |                            |         |                              |  |
|-------------|-------------|------------|-------------|----------------------------|---------|------------------------------|--|
| :blank line |             |            |             | USER: -- DATE: Nov 10 2010 |         |                              |  |
| F1: 399.746 | F2: 100.525 | SW1: 6410  | OF1: 2403.4 | PTS1d: 13132               | 16384   |                              |  |
| EX: s2pul   |             | PW: 8.0 us | PD: 1.0 sec | NA: 8                      | LB: 0.0 | Nuts - \$dlee111110-1-1H.fid |  |

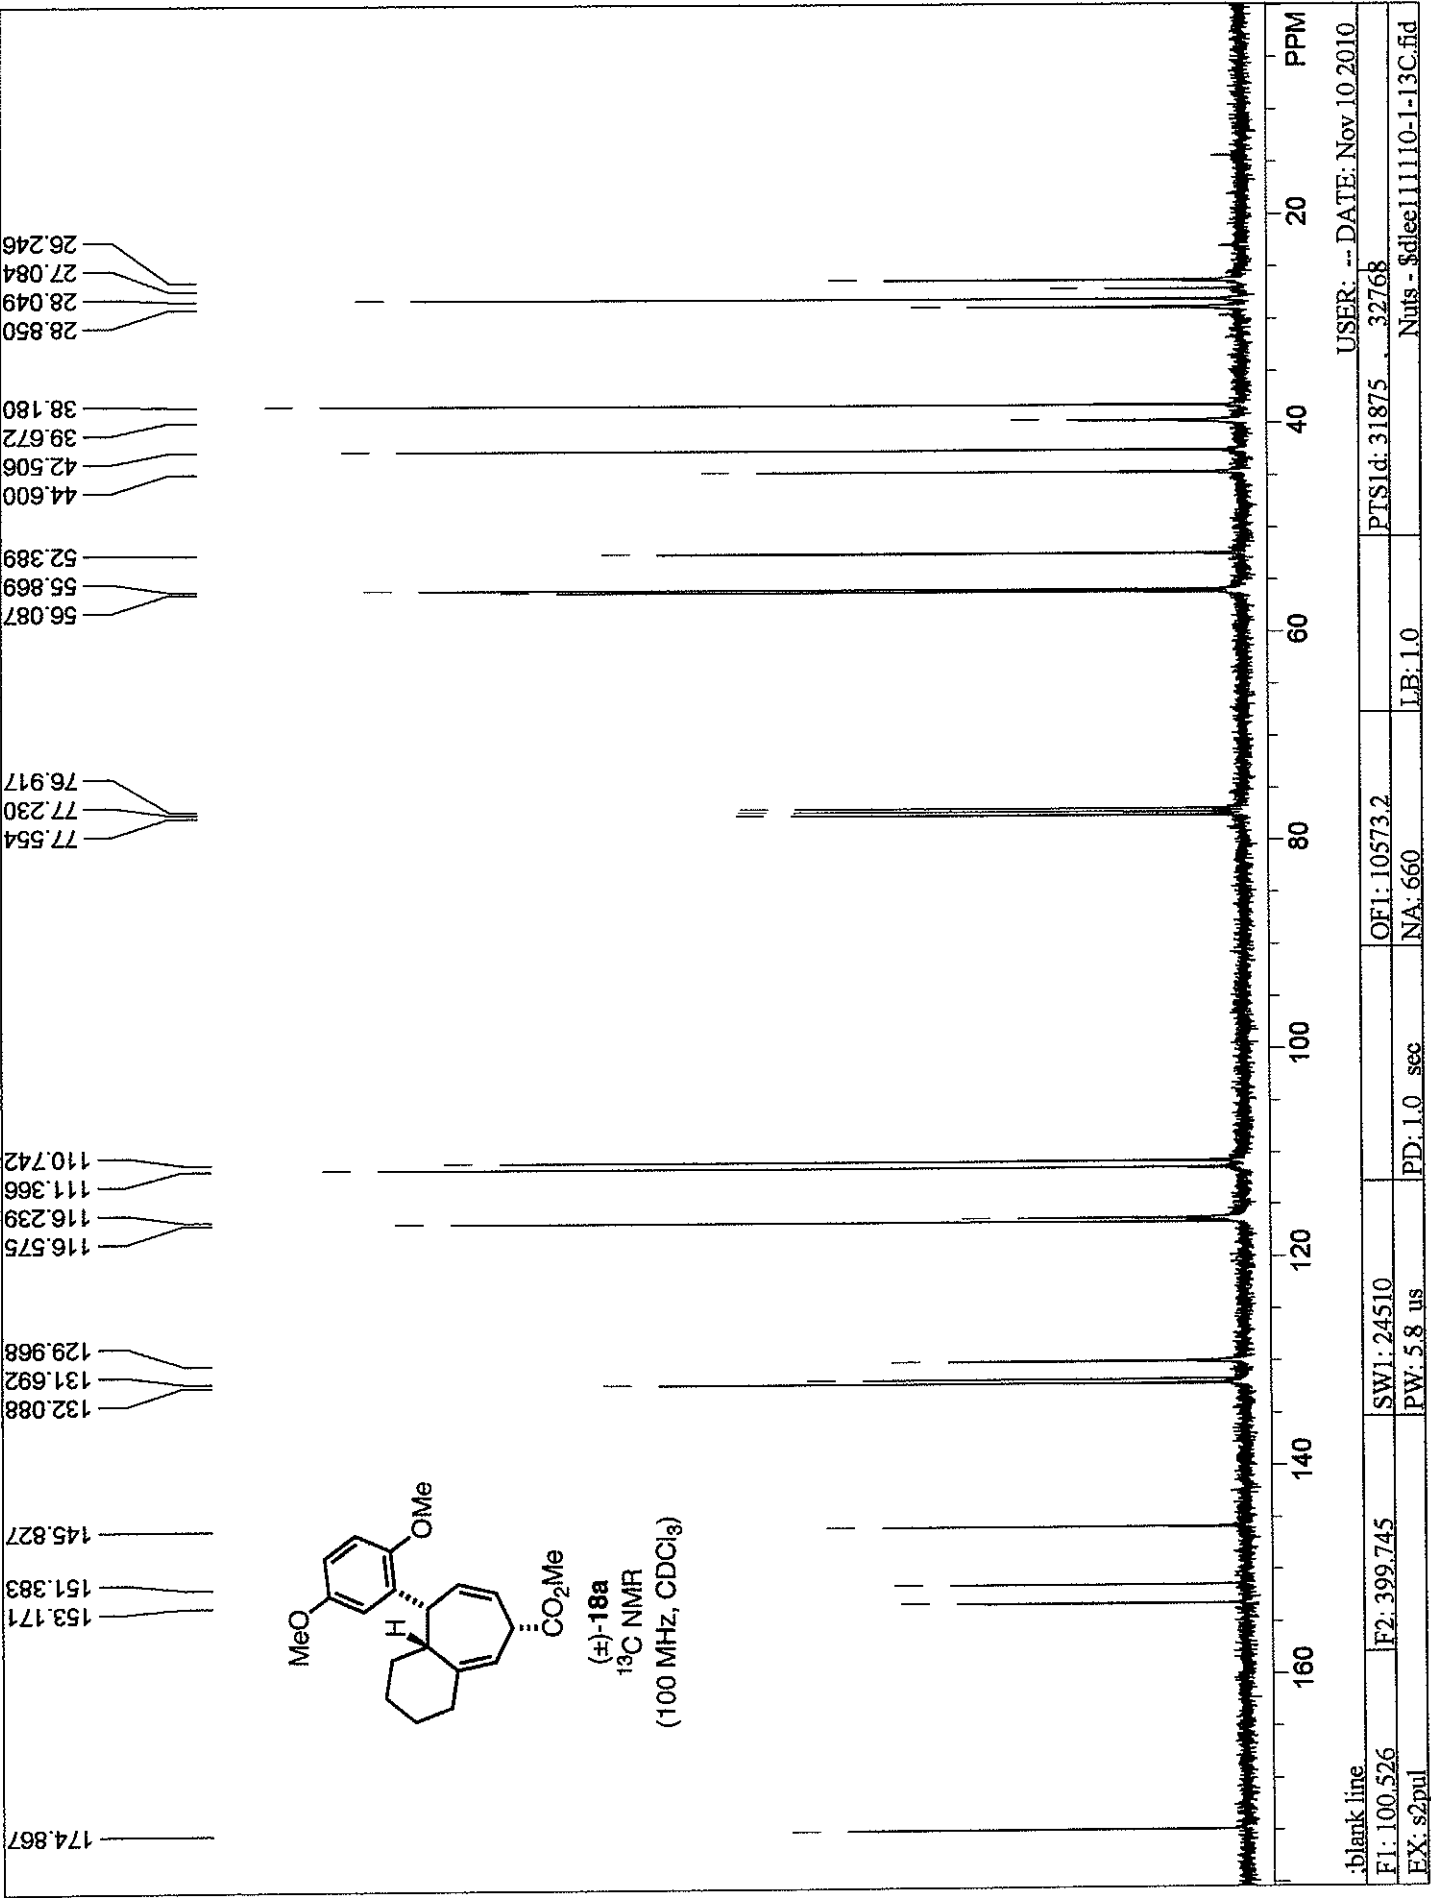

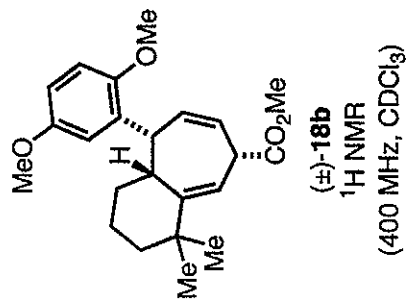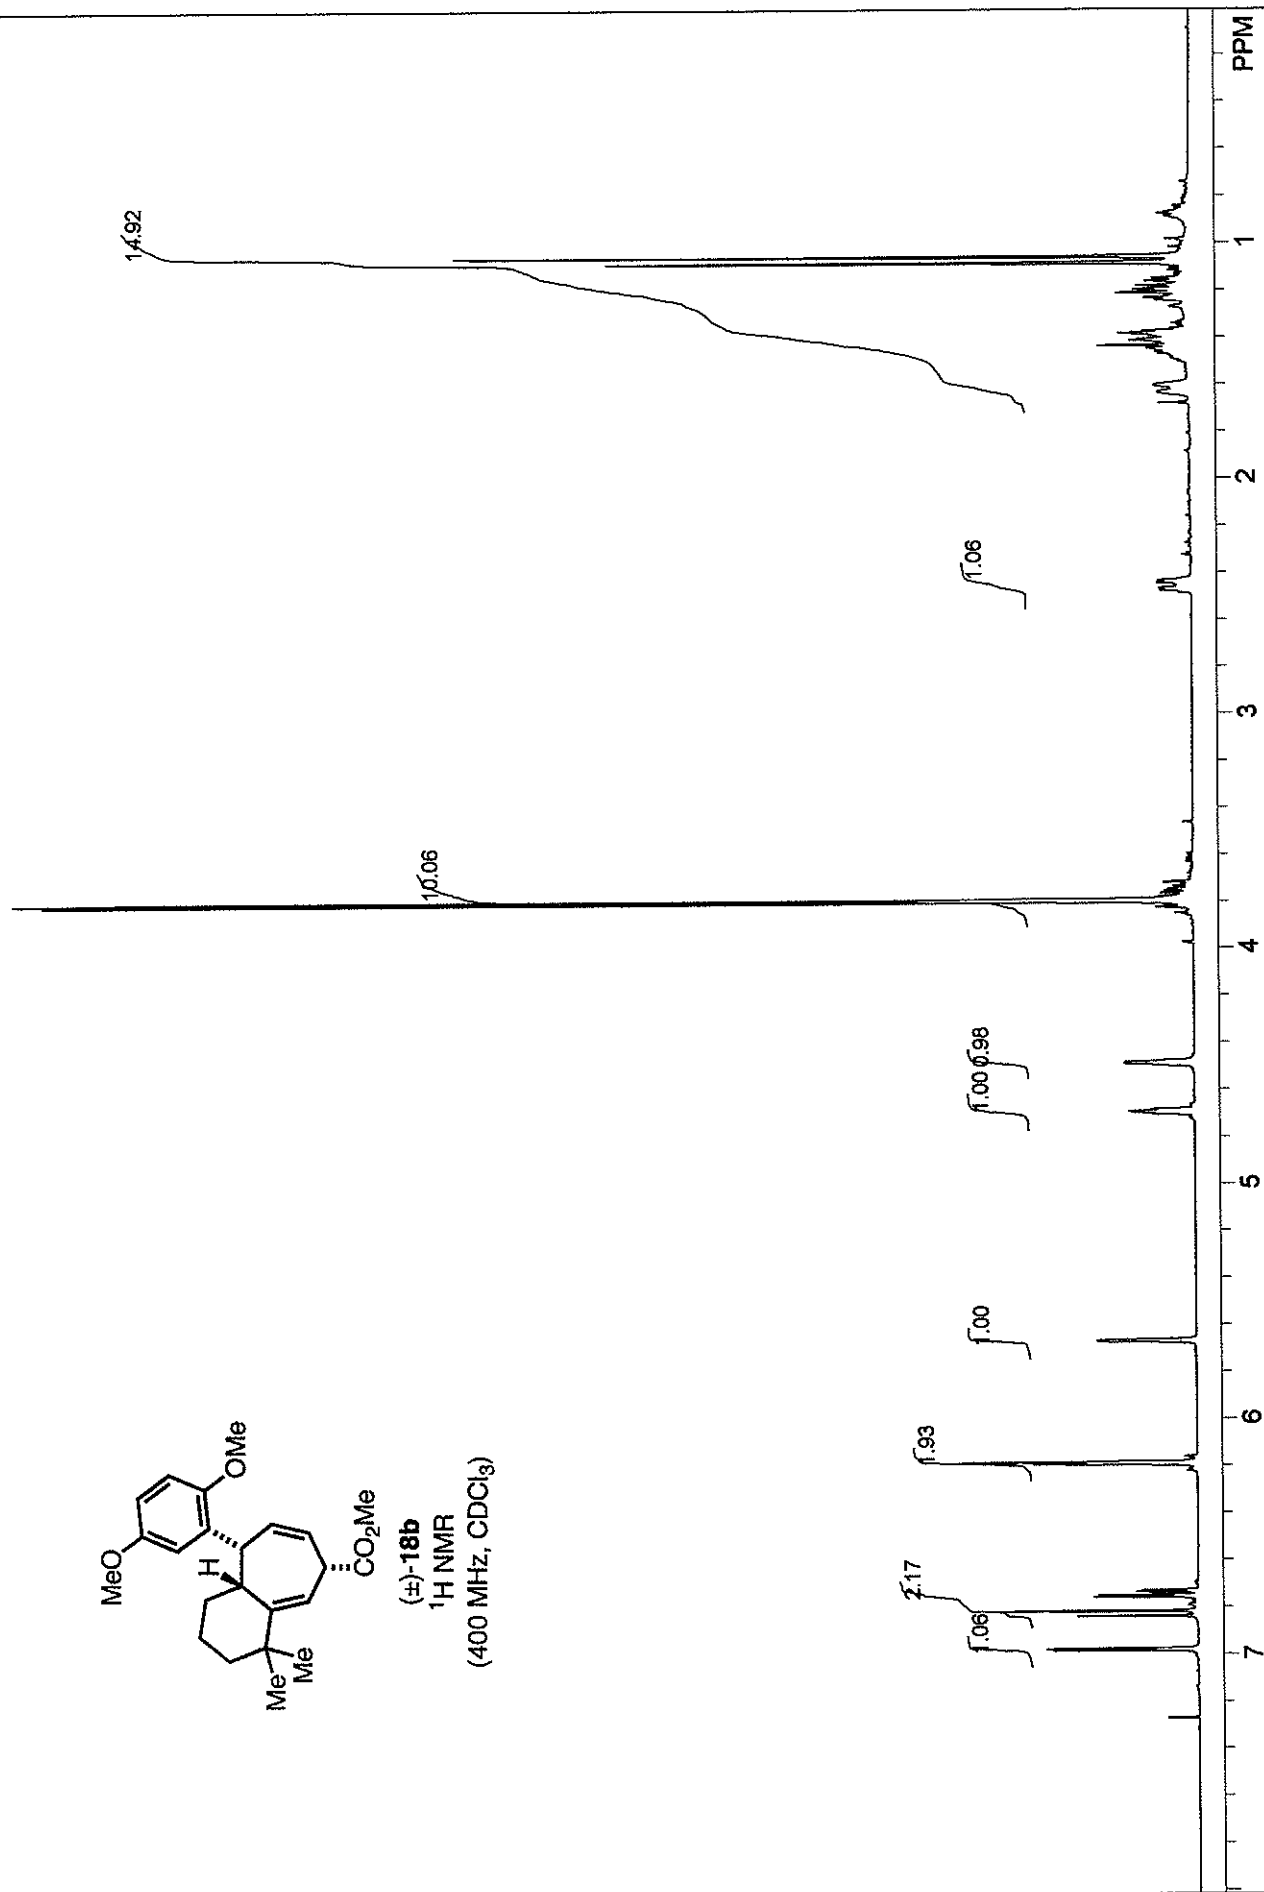

|             |             |            |             |                              |       |         |       |
|-------------|-------------|------------|-------------|------------------------------|-------|---------|-------|
| :blank line |             |            |             | USER: -- DATE: Jan 21 2011   |       |         |       |
| F1: 399.746 | F2: 100.525 | SW1: 6410  | OF1: 2403.5 | PTS1d: 13132                 | 16384 | LB: 0.0 | NA: 8 |
| EX: s2pul   |             | PW: 8.0 us | PD: 1.0 sec | Nuts - \$dlee012111-2-1H.fid |       |         |       |



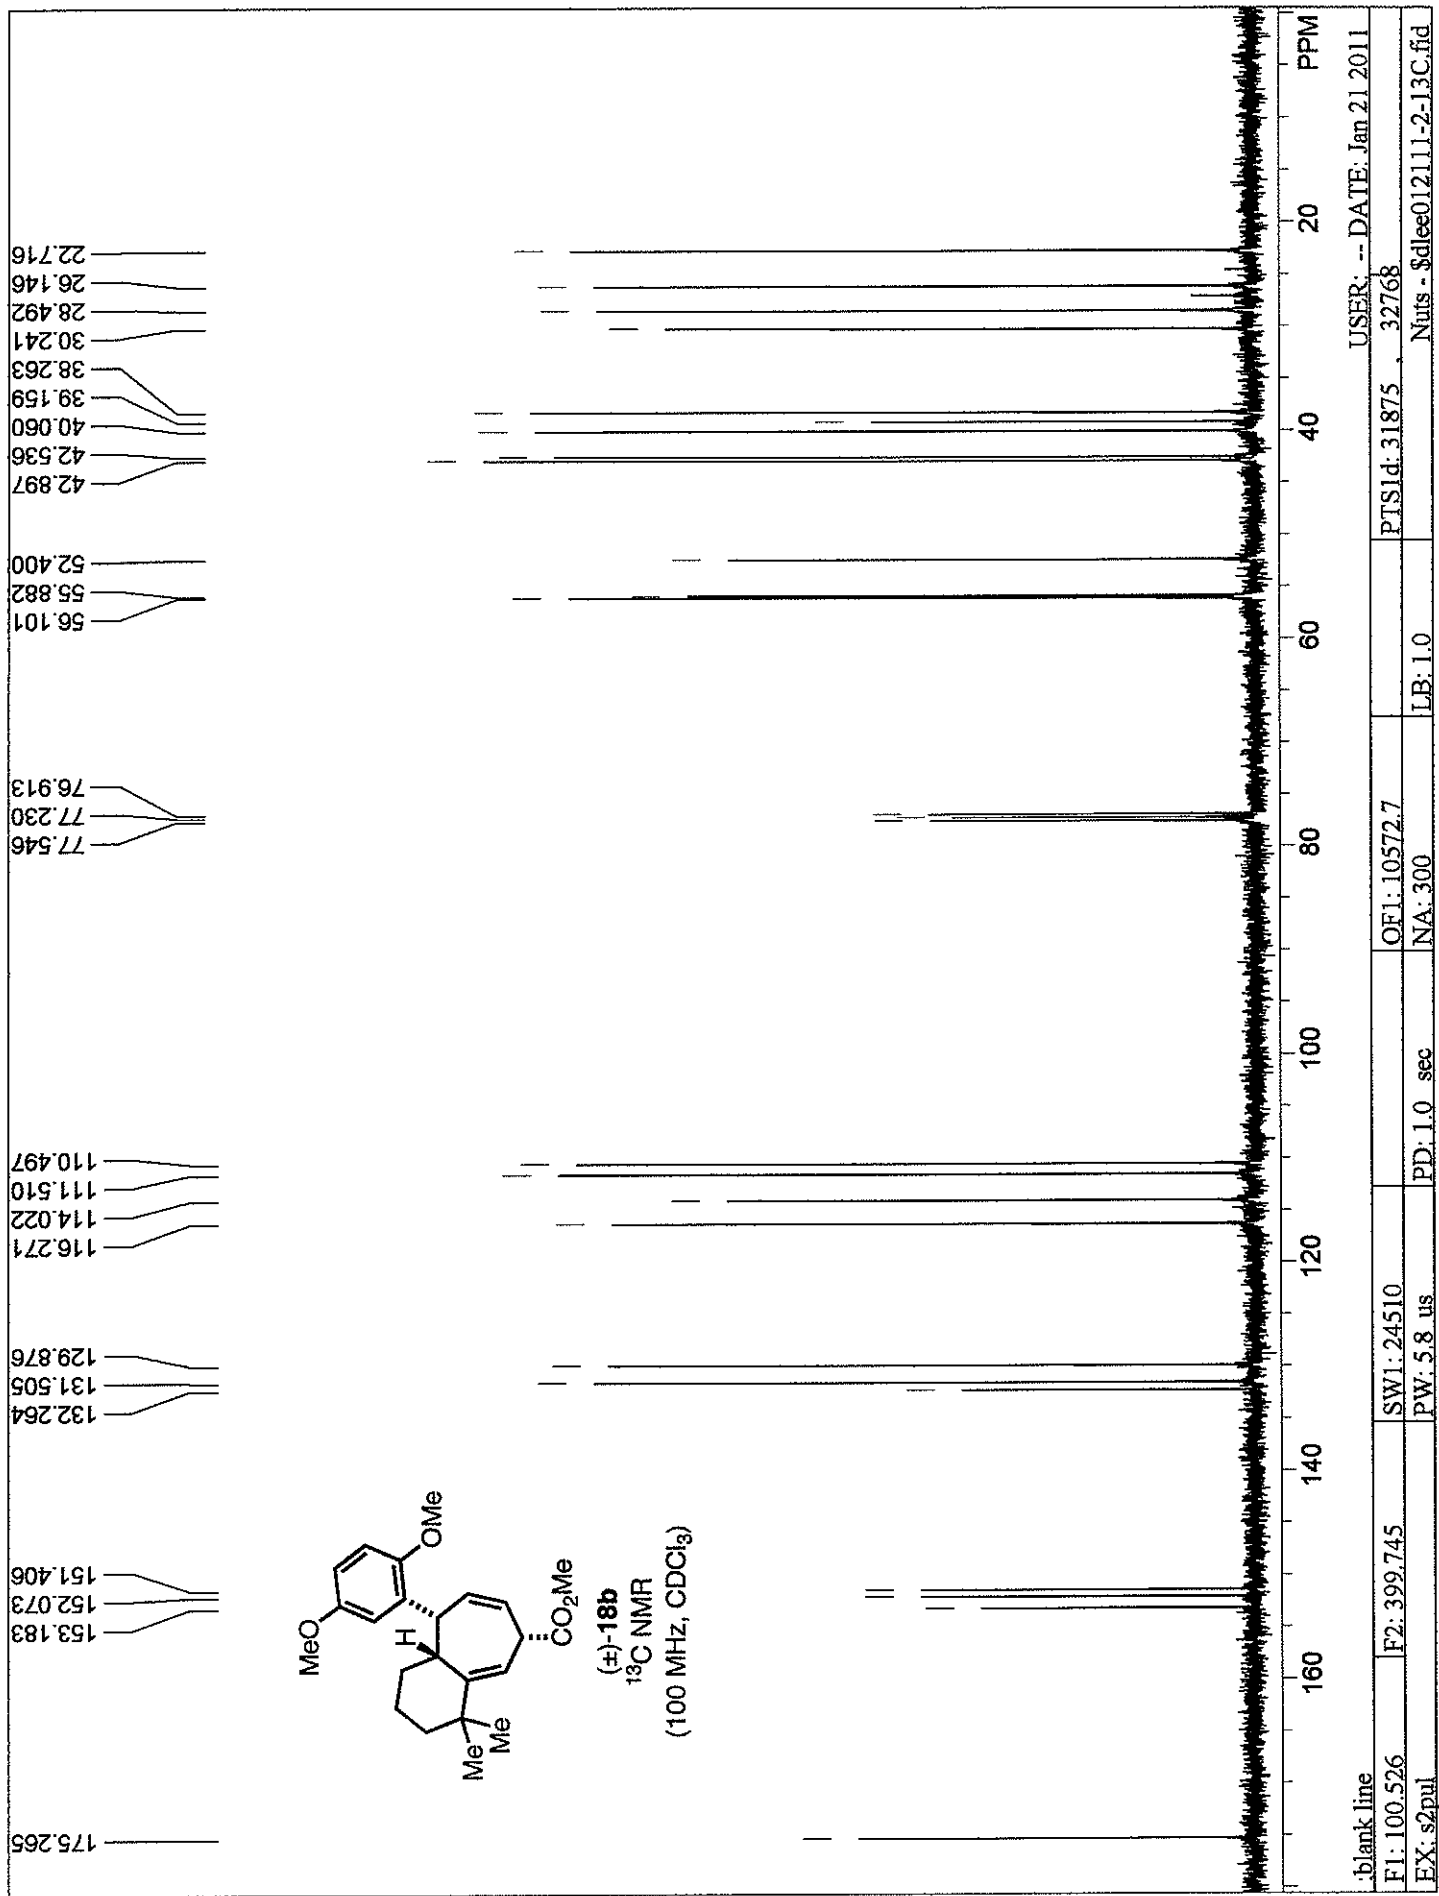

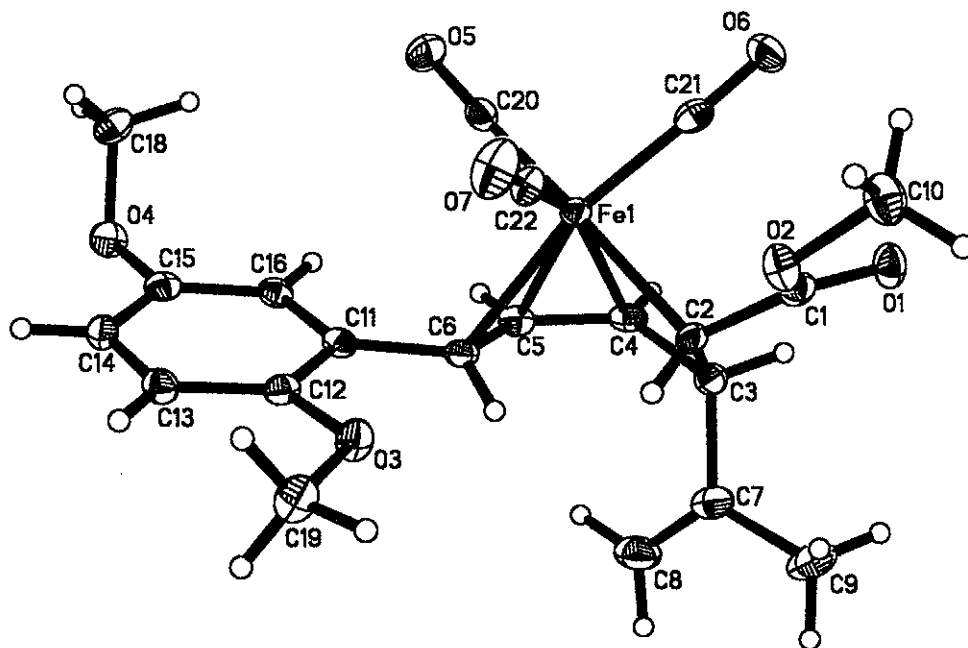

ORTEP of (±)-10

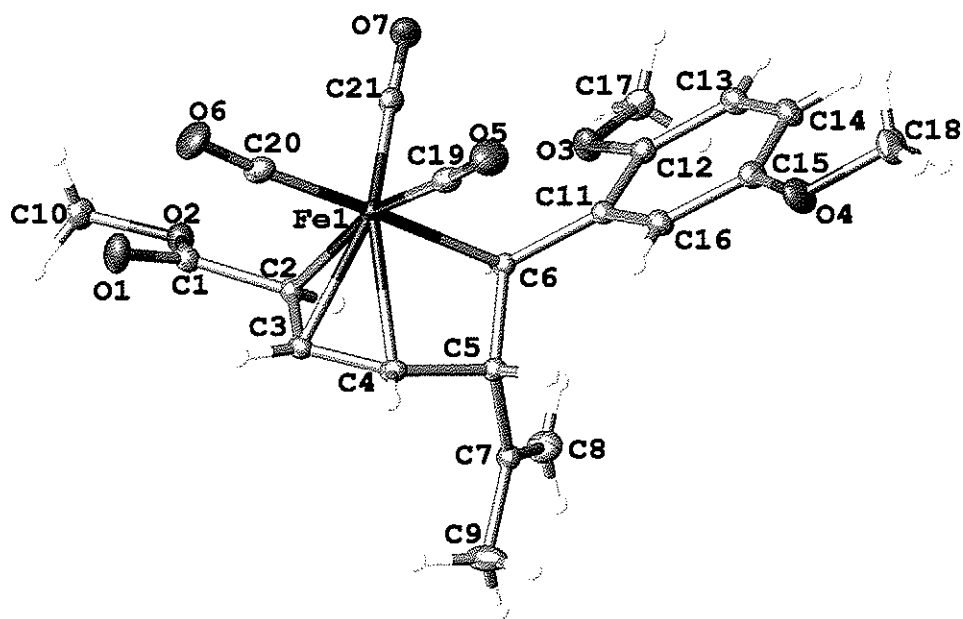

ORTEP of (±)-11

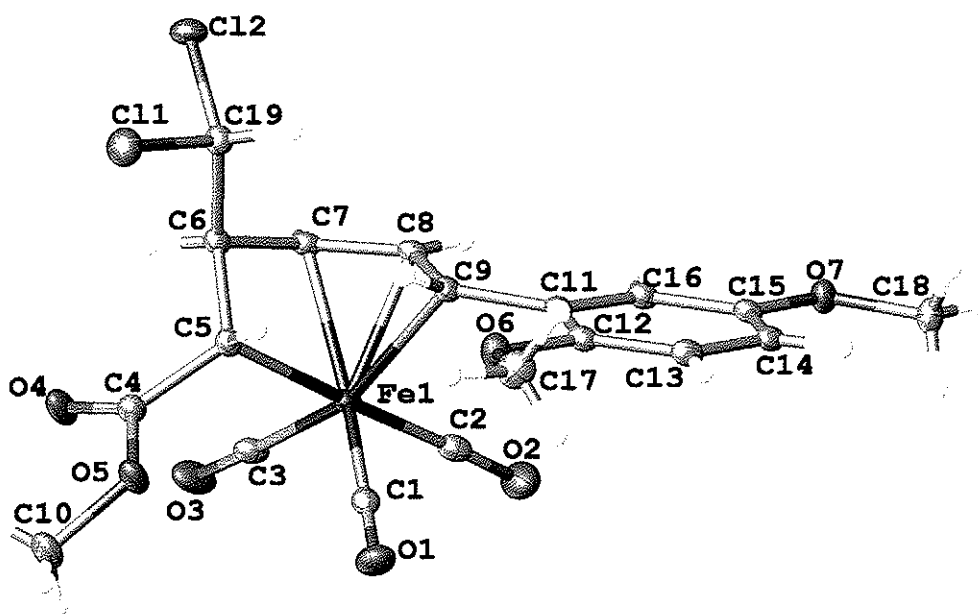

ORTEP of (±)-15

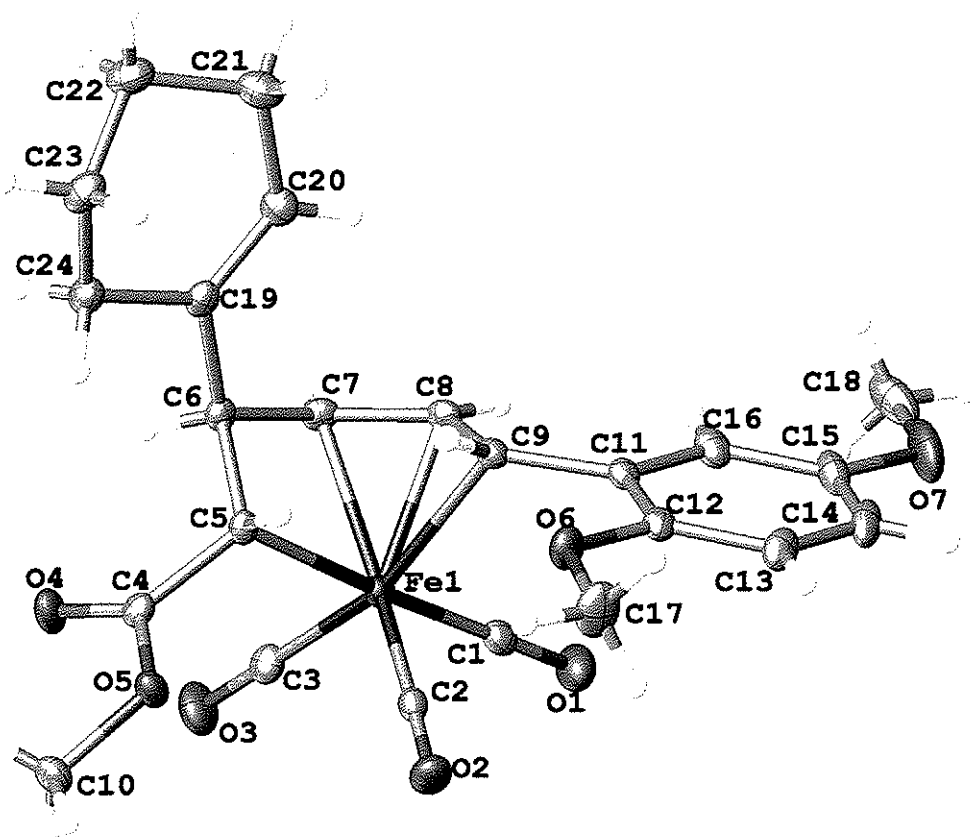

ORTEP of (±)-16a
